# Supplementary material for: APE1 recruits ATRIP to ssDNA in an RPA-dependent and -independent manner to promote the ATR DNA damage response
Source: eLife journal article supplement (doi:10.7554/elife.82324), 2023-05-09

Figure 3-figure supplement 1

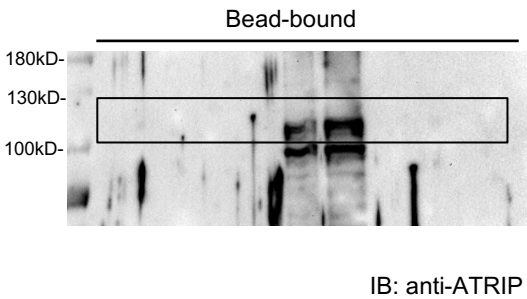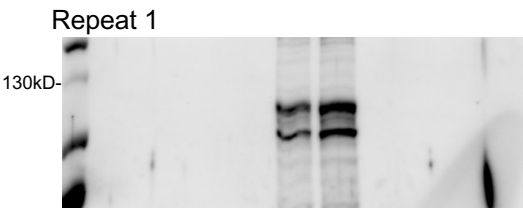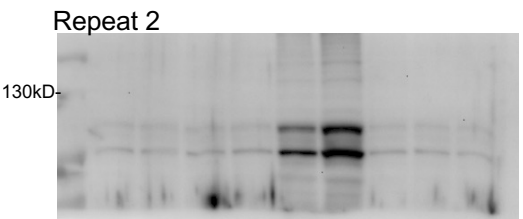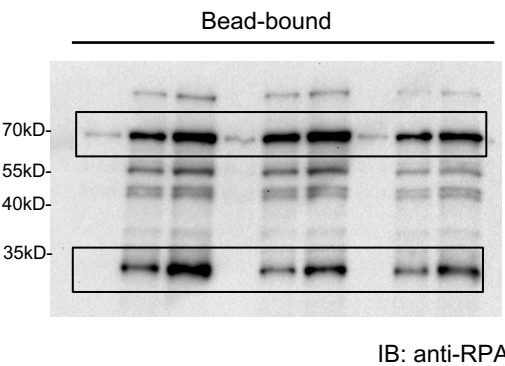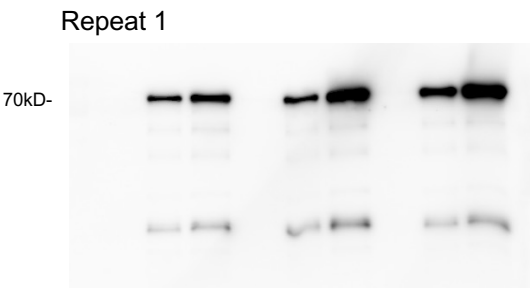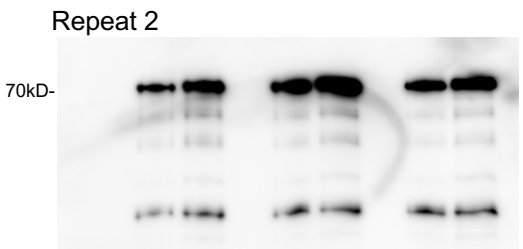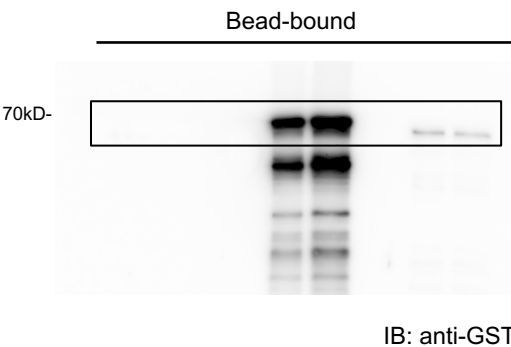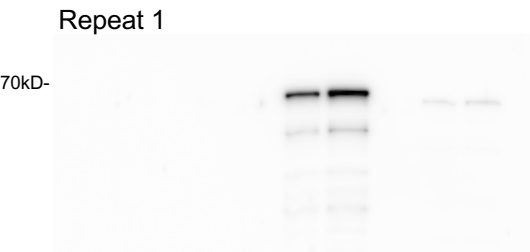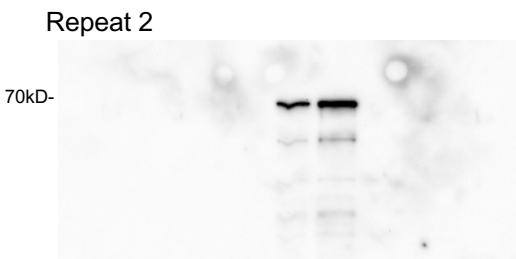

# Figure 3-figure supplement 1

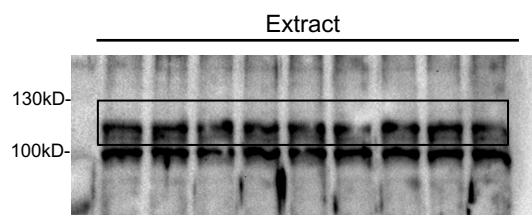

IB: anti-ATRIP

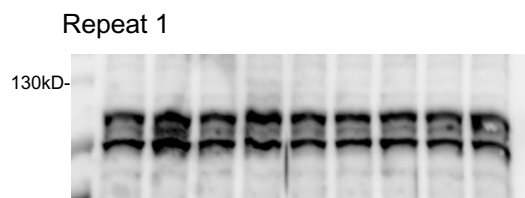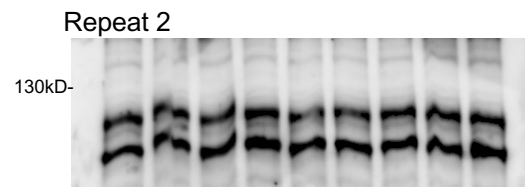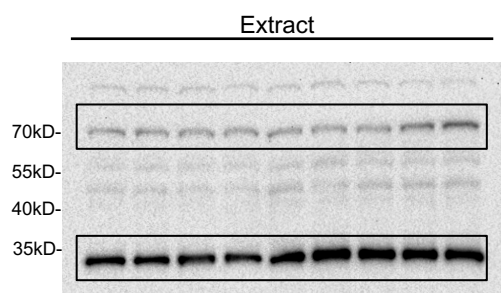

IB: anti-RPA

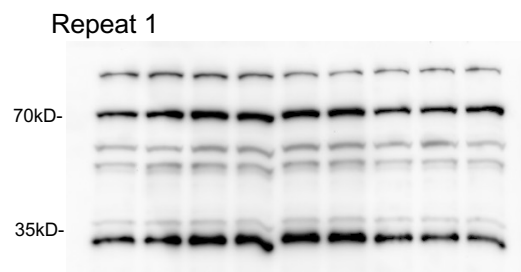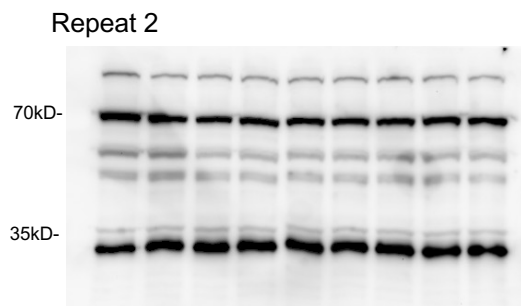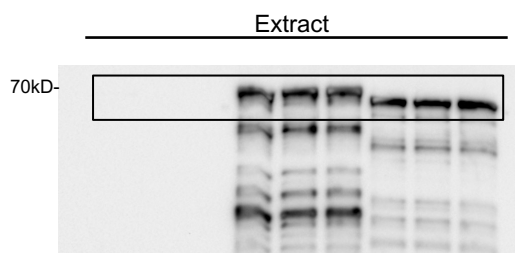

IB: anti-GST

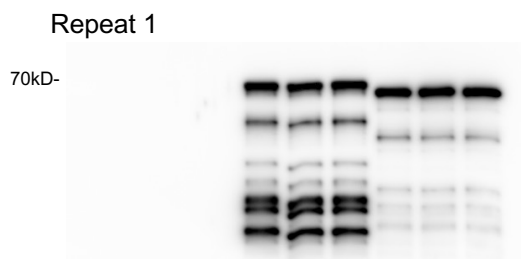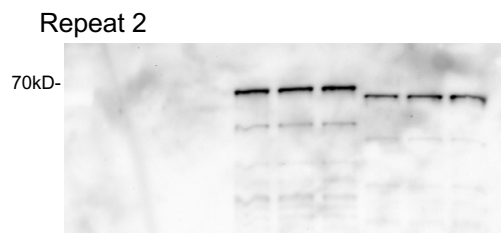

## Figure 3-figure supplement 1

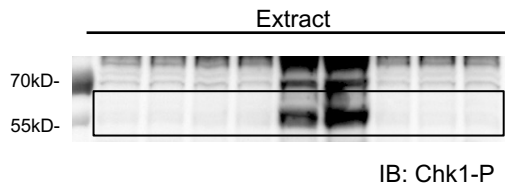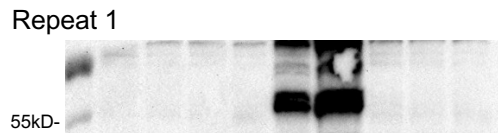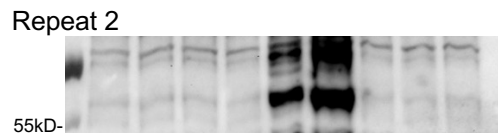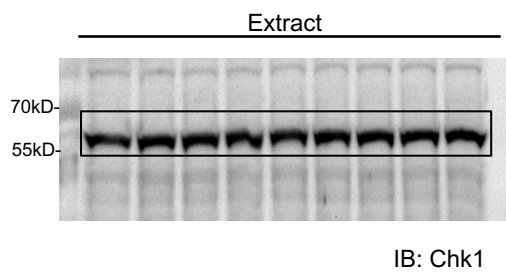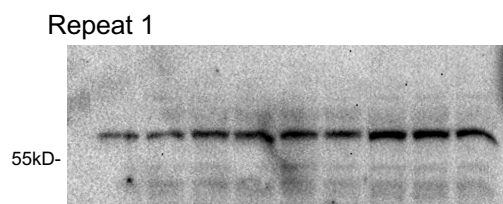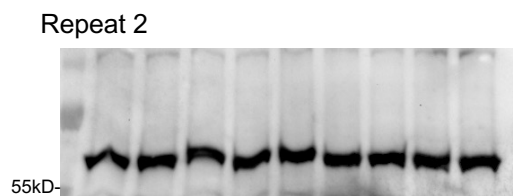

Supplement: fig3-figsupp1-data1 [file elife-82324-fig3-figsupp1-data1-v1.zip]
