# Supplementary material for: APE1 recruits ATRIP to ssDNA in an RPA-dependent and -independent manner to promote the ATR DNA damage response
Source: eLife journal article supplement (doi:10.7554/elife.82324), 2023-05-09
Supplement: fig1-data4 [file elife-82324-fig1-data4-v1.zip]

# Figure 1D

Bead-bound

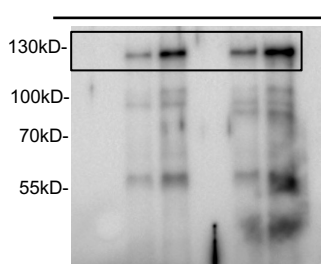

IB: anti-ATRIP

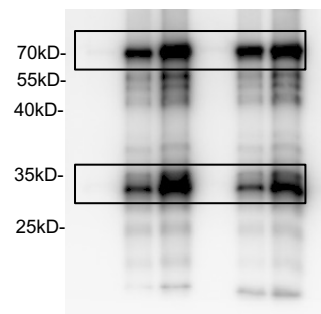

IB: anti-RPA

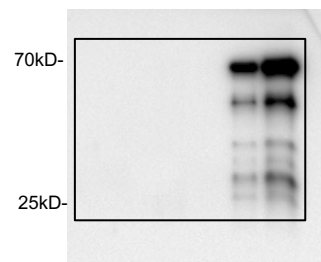

IB: anti-GST

Input

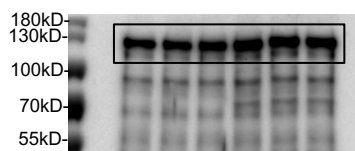

IB: anti-ATRIP

Repeat1

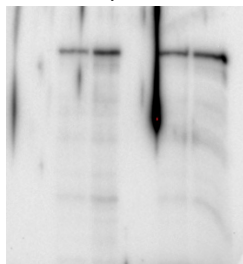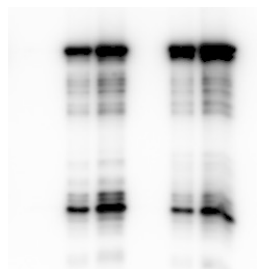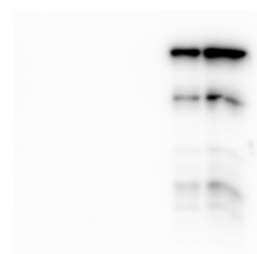

Repeat2

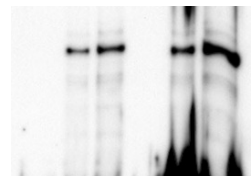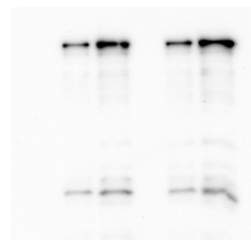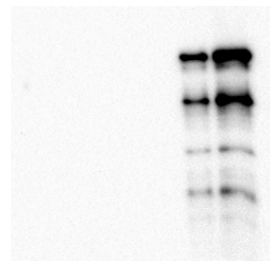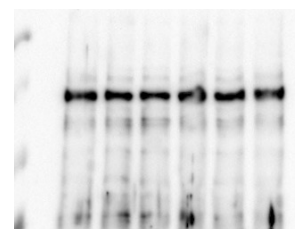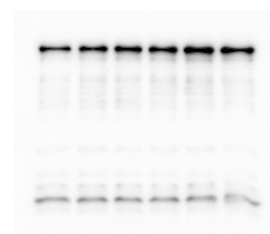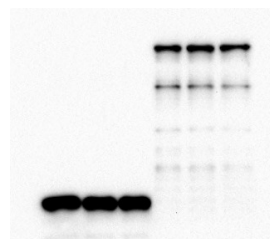

IB: anti-RPA

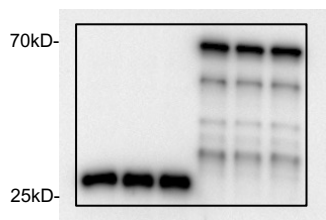

IB: anti-GST
