# Supplementary material for: APE1 recruits ATRIP to ssDNA in an RPA-dependent and -independent manner to promote the ATR DNA damage response
Source: eLife. 2023 May 22;12:e82324. doi: 10.7554/eLife.82324 (PMC10202453; doi:10.7554/eLife.82324)
Supplement: Figure 1—source data 4. [file elife-82324-fig1-data4.zip]

Archive with 48 entries (44 files):
- Figure 1-source data 4/
- __MACOSX/._Figure 1-source data 4
- Figure 1-source data 4/IB-data-Figure 1D.pdf
- __MACOSX/Figure 1-source data 4/._IB-data-Figure 1D.pdf
- Figure 1-source data 4/.DS_Store
- __MACOSX/Figure 1-source data 4/._.DS_Store
- Figure 1-source data 4/Figure 1D Repeat2/
- __MACOSX/Figure 1-source data 4/._Figure 1D Repeat2
- Figure 1-source data 4/Figure 1D Repeat1/
- __MACOSX/Figure 1-source data 4/._Figure 1D Repeat1
- Figure 1-source data 4/Figure 1D intial trial/
- __MACOSX/Figure 1-source data 4/._Figure 1D intial trial
- Figure 1-source data 4/Figure 1D Repeat2/Input-ATRIP.tif
- __MACOSX/Figure 1-source data 4/Figure 1D Repeat2/._Input-ATRIP.tif
- Figure 1-source data 4/Figure 1D Repeat2/Bead-bound-GST.tif
- __MACOSX/Figure 1-source data 4/Figure 1D Repeat2/._Bead-bound-GST.tif
- Figure 1-source data 4/Figure 1D Repeat2/Bead-bound-RPA.tif
- __MACOSX/Figure 1-source data 4/Figure 1D Repeat2/._Bead-bound-RPA.tif
- Figure 1-source data 4/Figure 1D Repeat2/Bead-bound-ATRIP.tif
- __MACOSX/Figure 1-source data 4/Figure 1D Repeat2/._Bead-bound-ATRIP.tif
- Figure 1-source data 4/Figure 1D Repeat2/Input-RPA.tif
- __MACOSX/Figure 1-source data 4/Figure 1D Repeat2/._Input-RPA.tif
- Figure 1-source data 4/Figure 1D Repeat2/Input-GST.tif
- __MACOSX/Figure 1-source data 4/Figure 1D Repeat2/._Input-GST.tif
- Figure 1-source data 4/Figure 1D Repeat1/Input-ATRIP.tif
- __MACOSX/Figure 1-source data 4/Figure 1D Repeat1/._Input-ATRIP.tif
- Figure 1-source data 4/Figure 1D Repeat1/Bead-bound-GST.tif
- __MACOSX/Figure 1-source data 4/Figure 1D Repeat1/._Bead-bound-GST.tif
- Figure 1-source data 4/Figure 1D Repeat1/Bead-bound-RPA.tif
- __MACOSX/Figure 1-source data 4/Figure 1D Repeat1/._Bead-bound-RPA.tif
- Figure 1-source data 4/Figure 1D Repeat1/Bead-bound-ATRIP.tif
- __MACOSX/Figure 1-source data 4/Figure 1D Repeat1/._Bead-bound-ATRIP.tif
- Figure 1-source data 4/Figure 1D Repeat1/Input-RPA.tif
- __MACOSX/Figure 1-source data 4/Figure 1D Repeat1/._Input-RPA.tif
- Figure 1-source data 4/Figure 1D Repeat1/Input-GST.tif
- __MACOSX/Figure 1-source data 4/Figure 1D Repeat1/._Input-GST.tif
- Figure 1-source data 4/Figure 1D intial trial/Input-ATRIP.tif
- __MACOSX/Figure 1-source data 4/Figure 1D intial trial/._Input-ATRIP.tif
- Figure 1-source data 4/Figure 1D intial trial/Bead-bound-GST.tif
- __MACOSX/Figure 1-source data 4/Figure 1D intial trial/._Bead-bound-GST.tif
- Figure 1-source data 4/Figure 1D intial trial/Bead-bound-RPA.tif
- __MACOSX/Figure 1-source data 4/Figure 1D intial trial/._Bead-bound-RPA.tif
- Figure 1-source data 4/Figure 1D intial trial/Bead-bound-ATRIP.tif
- __MACOSX/Figure 1-source data 4/Figure 1D intial trial/._Bead-bound-ATRIP.tif
- Figure 1-source data 4/Figure 1D intial trial/Input-RPA.tif
- __MACOSX/Figure 1-source data 4/Figure 1D intial trial/._Input-RPA.tif
- Figure 1-source data 4/Figure 1D intial trial/Input-GST.tif
- __MACOSX/Figure 1-source data 4/Figure 1D intial trial/._Input-GST.tif
