# Supplementary material for: APE1 recruits ATRIP to ssDNA in an RPA-dependent and -independent manner to promote the ATR DNA damage response
Source: eLife. 2023 May 22;12:e82324. doi: 10.7554/eLife.82324 (PMC10202453; doi:10.7554/eLife.82324)
Supplement: Figure 2—source data 3. [file elife-82324-fig2-data3.zip]

Archive with 24 entries (20 files):
- Figure 2-source data 3/
- __MACOSX/._Figure 2-source data 3
- Figure 2-source data 3/.DS_Store
- __MACOSX/Figure 2-source data 3/._.DS_Store
- Figure 2-source data 3/Figure 2D Repeat1/
- __MACOSX/Figure 2-source data 3/._Figure 2D Repeat1
- Figure 2-source data 3/Figure 2D initial trial/
- __MACOSX/Figure 2-source data 3/._Figure 2D initial trial
- Figure 2-source data 3/IB-data-Figure 2D.pdf
- __MACOSX/Figure 2-source data 3/._IB-data-Figure 2D.pdf
- Figure 2-source data 3/Figure 2D Repeat2/
- __MACOSX/Figure 2-source data 3/._Figure 2D Repeat2
- Figure 2-source data 3/Figure 2D Repeat1/Bead-bound-GST.tif
- __MACOSX/Figure 2-source data 3/Figure 2D Repeat1/._Bead-bound-GST.tif
- Figure 2-source data 3/Figure 2D Repeat1/Input-GST.tif
- __MACOSX/Figure 2-source data 3/Figure 2D Repeat1/._Input-GST.tif
- Figure 2-source data 3/Figure 2D initial trial/Bed-bound-GST.tif
- __MACOSX/Figure 2-source data 3/Figure 2D initial trial/._Bed-bound-GST.tif
- Figure 2-source data 3/Figure 2D initial trial/Input-GST.tif
- __MACOSX/Figure 2-source data 3/Figure 2D initial trial/._Input-GST.tif
- Figure 2-source data 3/Figure 2D Repeat2/Bead-bound-GST.tif
- __MACOSX/Figure 2-source data 3/Figure 2D Repeat2/._Bead-bound-GST.tif
- Figure 2-source data 3/Figure 2D Repeat2/Input-GST.tif
- __MACOSX/Figure 2-source data 3/Figure 2D Repeat2/._Input-GST.tif
