# Supplementary material for: APE1 recruits ATRIP to ssDNA in an RPA-dependent and -independent manner to promote the ATR DNA damage response
Source: eLife. 2023 May 22;12:e82324. doi: 10.7554/eLife.82324 (PMC10202453; doi:10.7554/eLife.82324)
Supplement: Figure 3—source data 1. [file elife-82324-fig3-data1.zip]

Archive with 36 entries (32 files):
- Figure 3-source data 1/
- __MACOSX/._Figure 3-source data 1
- Figure 3-source data 1/Figure 3A Repeat2/
- __MACOSX/Figure 3-source data 1/._Figure 3A Repeat2
- Figure 3-source data 1/Figure 3A initial trial/
- __MACOSX/Figure 3-source data 1/._Figure 3A initial trial
- Figure 3-source data 1/.DS_Store
- __MACOSX/Figure 3-source data 1/._.DS_Store
- Figure 3-source data 1/Figure 3A Repeat1/
- __MACOSX/Figure 3-source data 1/._Figure 3A Repeat1
- Figure 3-source data 1/IB-data-Figure 3A.pdf
- __MACOSX/Figure 3-source data 1/._IB-data-Figure 3A.pdf
- Figure 3-source data 1/Figure 3A Repeat2/Input-ATRIP.tif
- __MACOSX/Figure 3-source data 1/Figure 3A Repeat2/._Input-ATRIP.tif
- Figure 3-source data 1/Figure 3A Repeat2/Pulldown-GST.tif
- __MACOSX/Figure 3-source data 1/Figure 3A Repeat2/._Pulldown-GST.tif
- Figure 3-source data 1/Figure 3A Repeat2/Input-GST.tif
- __MACOSX/Figure 3-source data 1/Figure 3A Repeat2/._Input-GST.tif
- Figure 3-source data 1/Figure 3A Repeat2/Pulldown-ATRIP.tif
- __MACOSX/Figure 3-source data 1/Figure 3A Repeat2/._Pulldown-ATRIP.tif
- Figure 3-source data 1/Figure 3A initial trial/Input-ATRIP.tif
- __MACOSX/Figure 3-source data 1/Figure 3A initial trial/._Input-ATRIP.tif
- Figure 3-source data 1/Figure 3A initial trial/Pulldown-GST.tif
- __MACOSX/Figure 3-source data 1/Figure 3A initial trial/._Pulldown-GST.tif
- Figure 3-source data 1/Figure 3A initial trial/Input-GST.tif
- __MACOSX/Figure 3-source data 1/Figure 3A initial trial/._Input-GST.tif
- Figure 3-source data 1/Figure 3A initial trial/Pulldown-ATRIP.tif
- __MACOSX/Figure 3-source data 1/Figure 3A initial trial/._Pulldown-ATRIP.tif
- Figure 3-source data 1/Figure 3A Repeat1/Input-ATRIP.tif
- __MACOSX/Figure 3-source data 1/Figure 3A Repeat1/._Input-ATRIP.tif
- Figure 3-source data 1/Figure 3A Repeat1/Pulldown-GST.tif
- __MACOSX/Figure 3-source data 1/Figure 3A Repeat1/._Pulldown-GST.tif
- Figure 3-source data 1/Figure 3A Repeat1/Input-GST.tif
- __MACOSX/Figure 3-source data 1/Figure 3A Repeat1/._Input-GST.tif
- Figure 3-source data 1/Figure 3A Repeat1/Pulldown-ATRIP.tif
- __MACOSX/Figure 3-source data 1/Figure 3A Repeat1/._Pulldown-ATRIP.tif
