# Supplementary figures and images for: APE1 recruits ATRIP to ssDNA in an RPA-dependent and -independent manner to promote the ATR DNA damage response
Source: eLife journal article supplement (doi:10.7554/elife.82324), 2023-05-09

Figure 1A

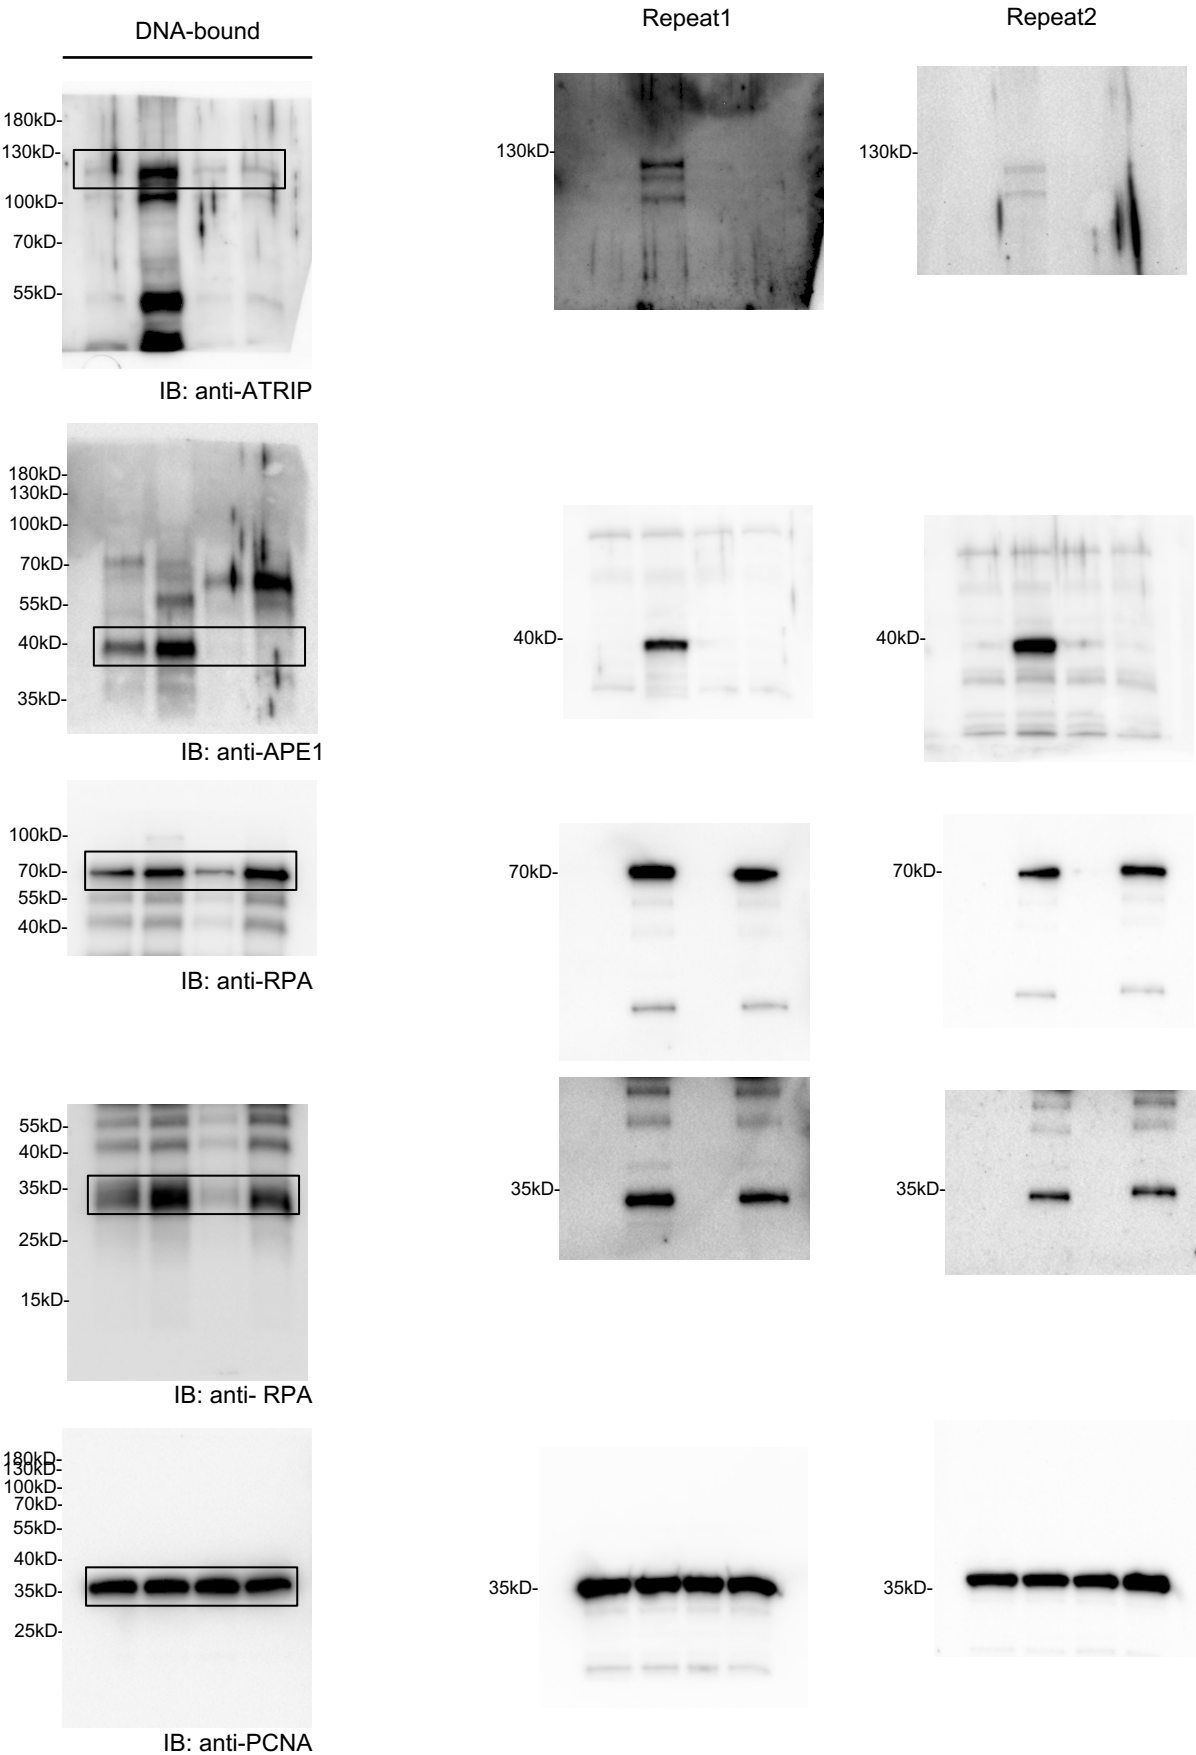

Figure 1A

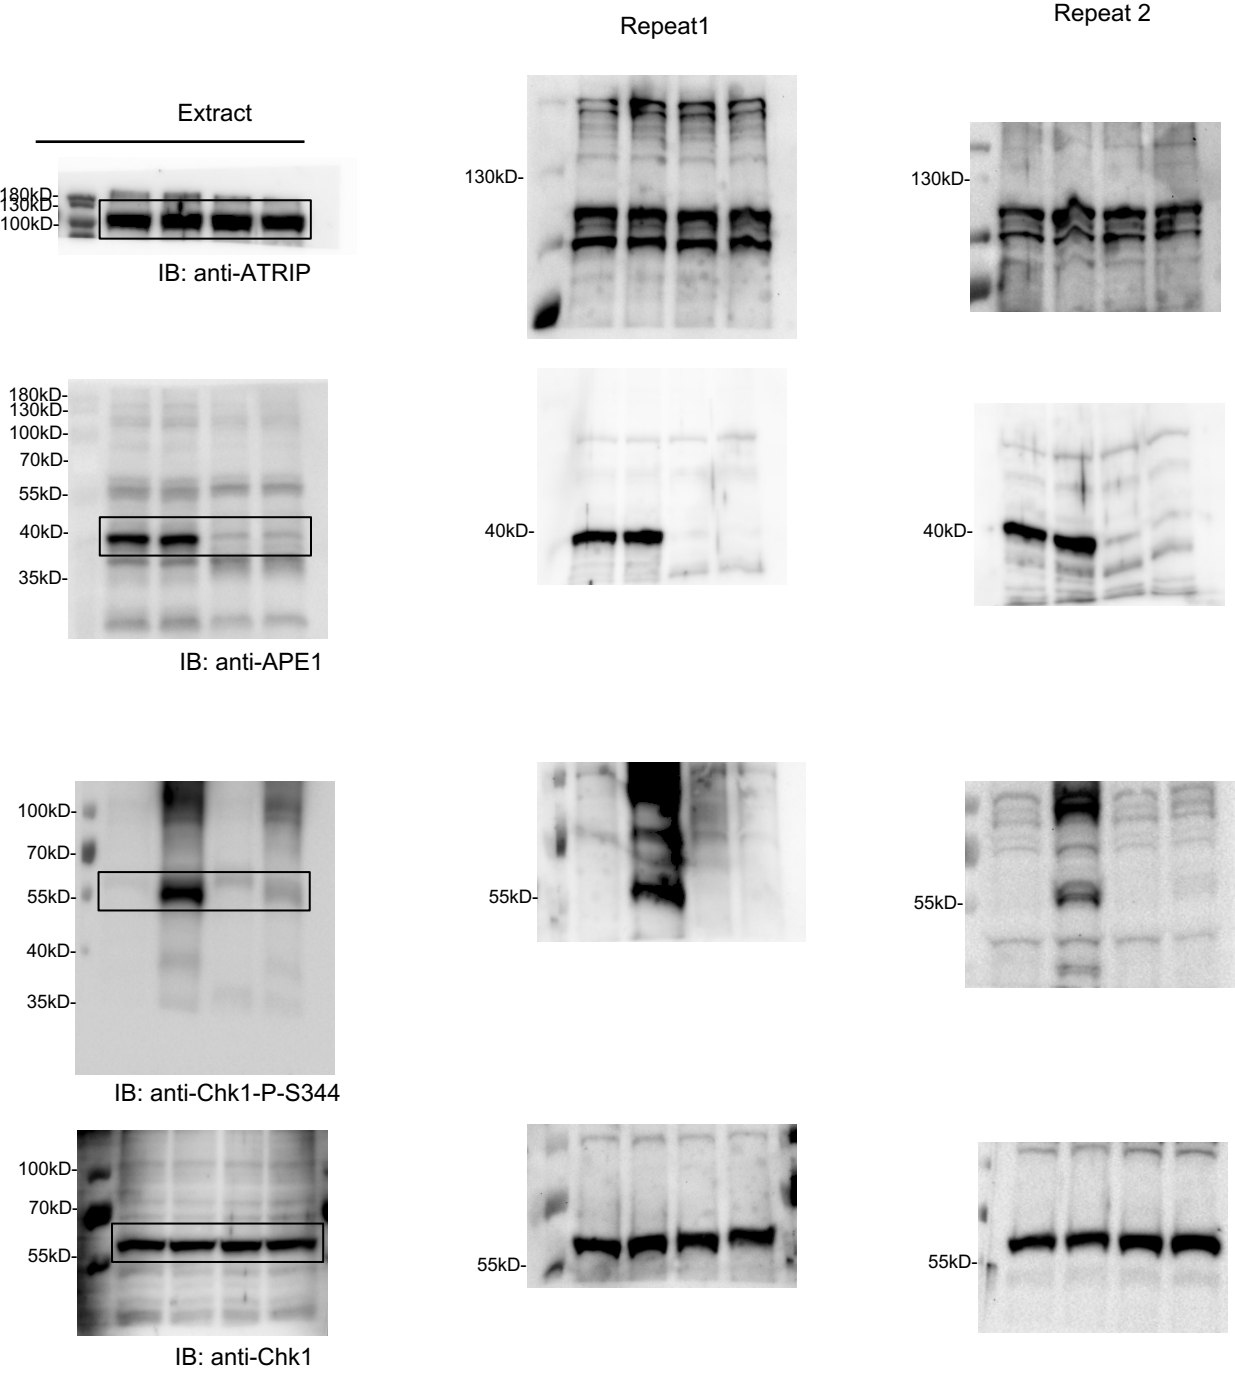

Supplement: fig1-data1 [file elife-82324-fig1-data1-v1.zip]

Figure 1B

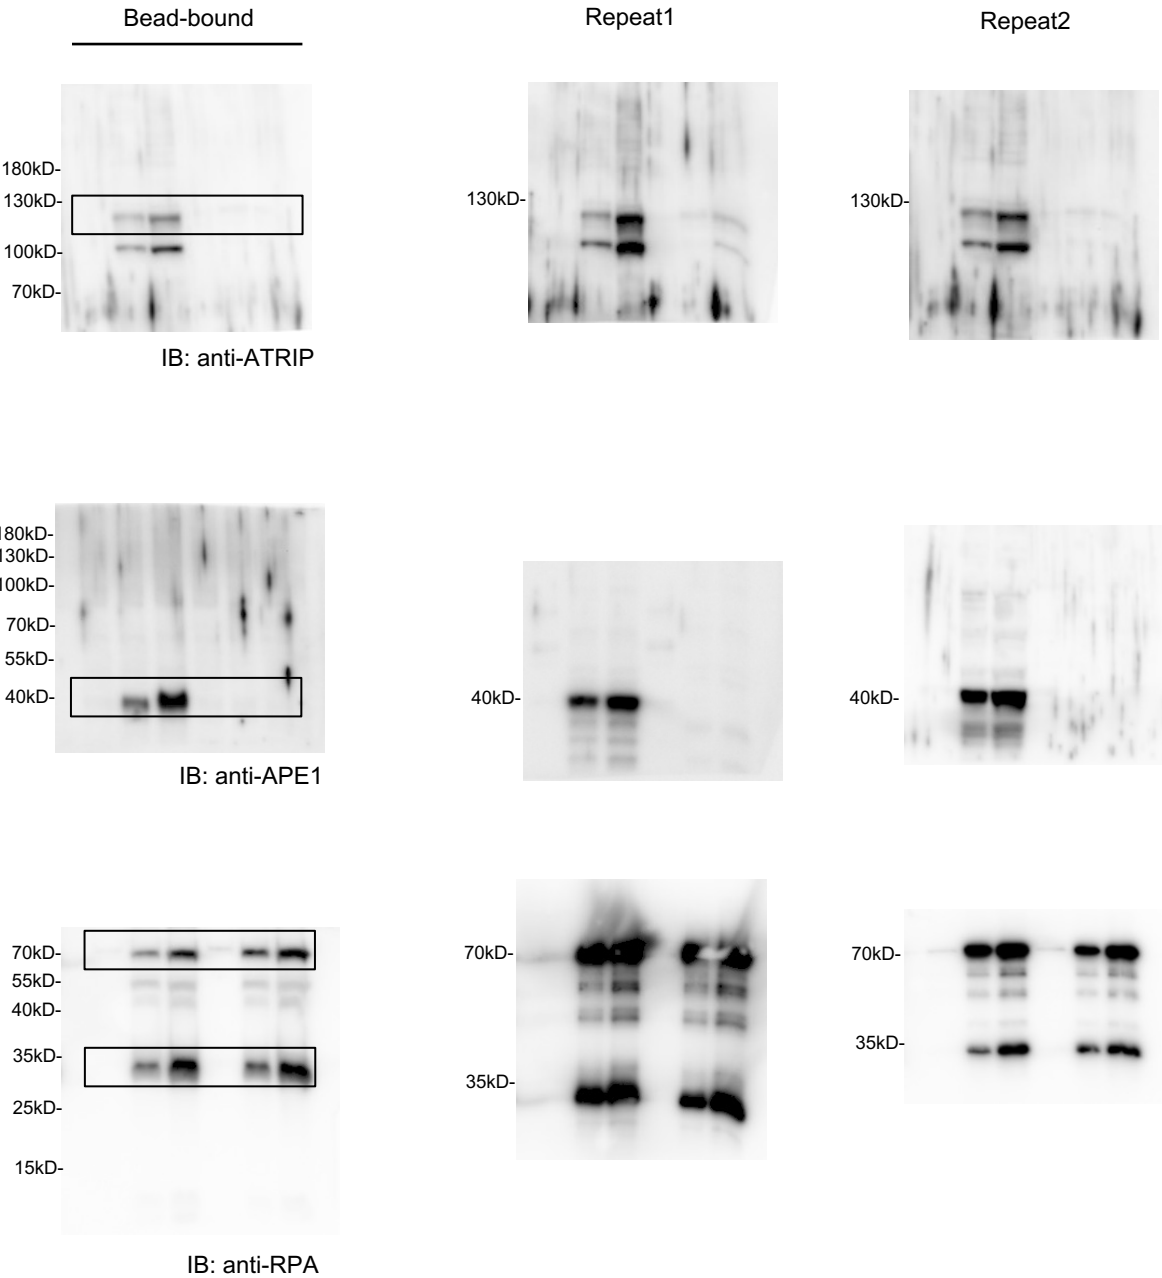

Figure 1B

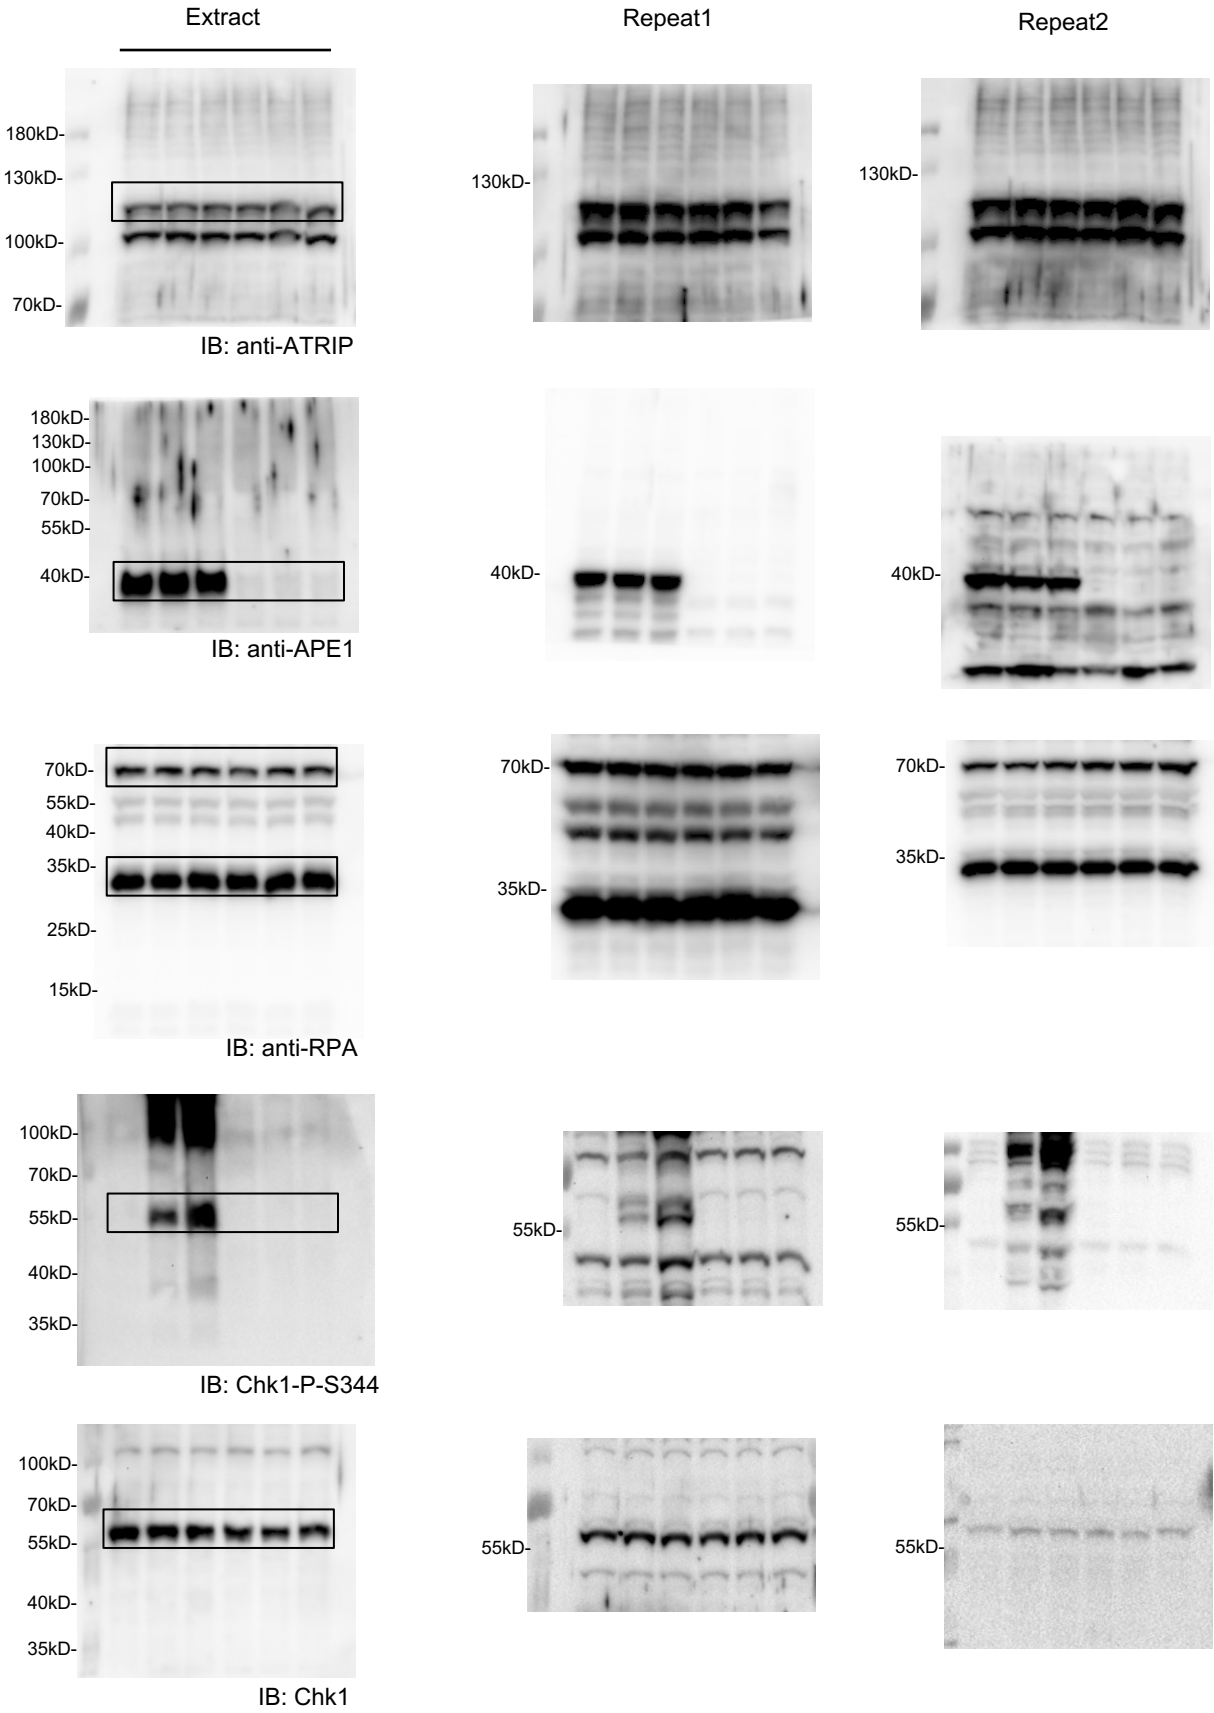

Supplement: fig1-data2 [file IB-data-Figure 1B.pdf › Figure 1-source data 2/IB-data-Figure 1B.pdf]

Figure 1C

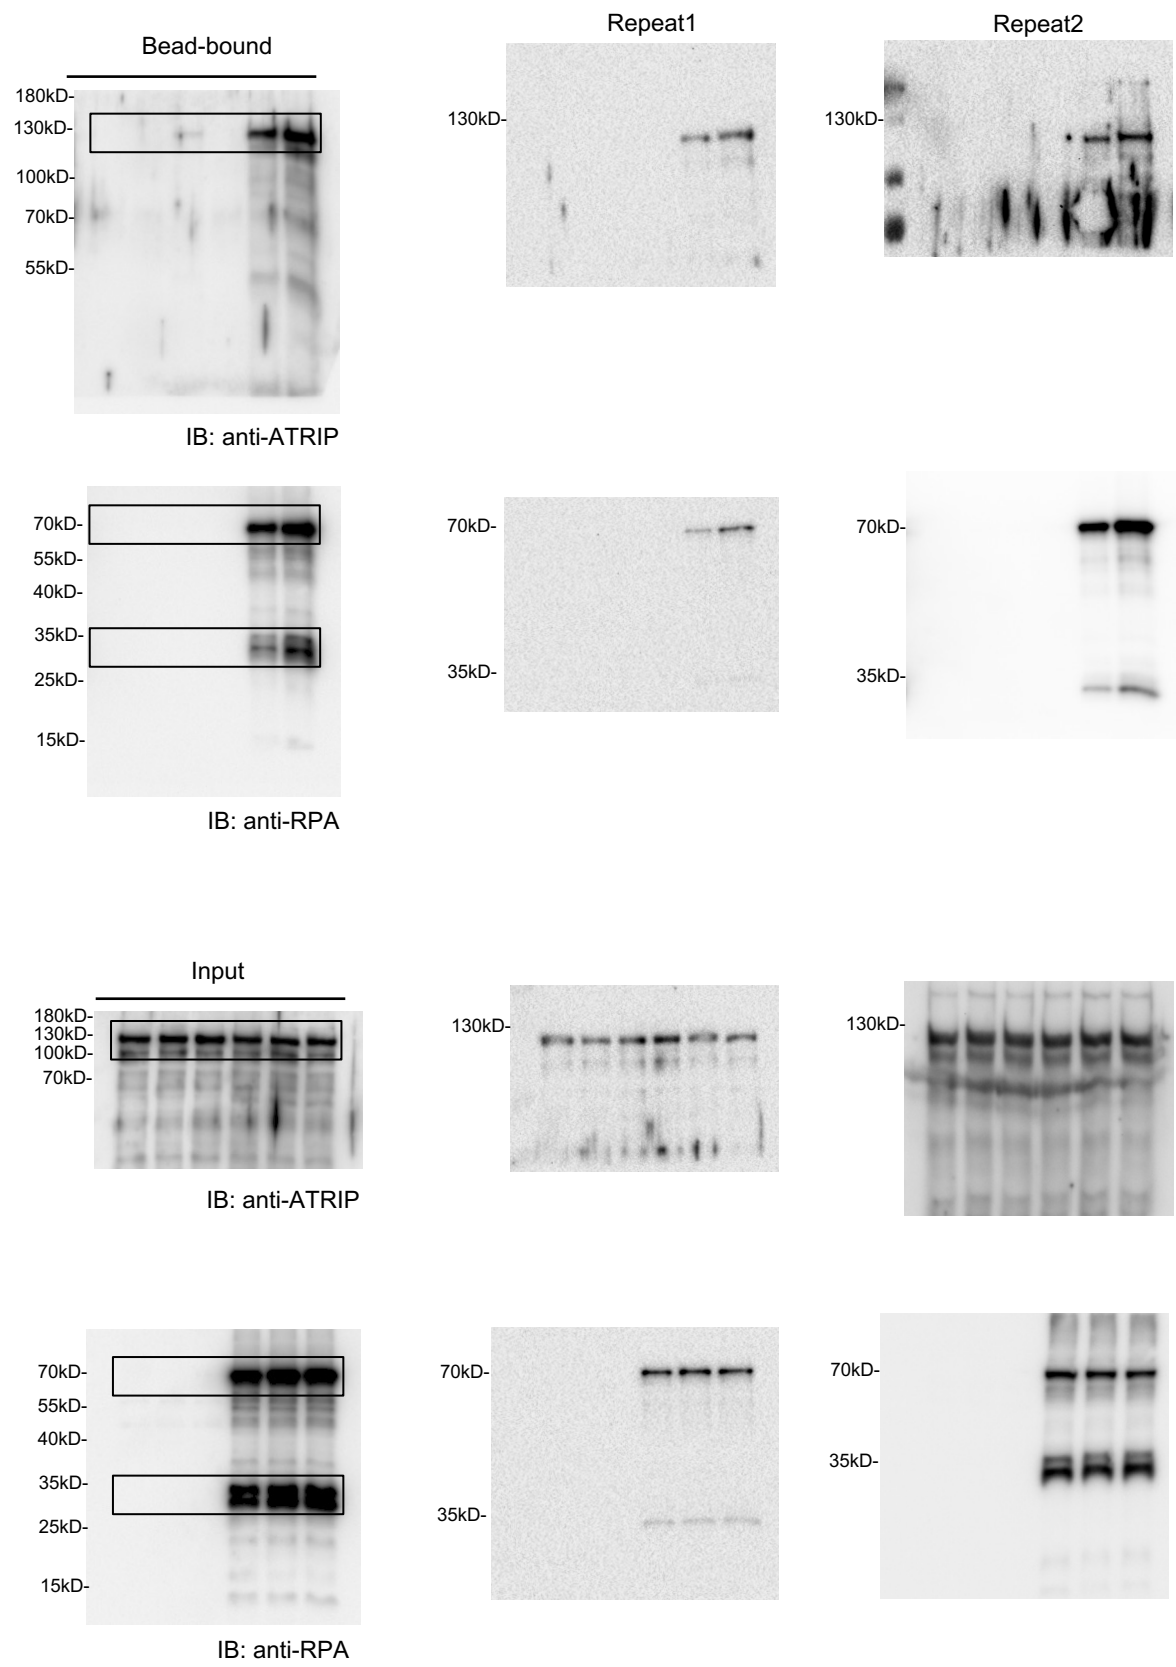

Supplement: fig1-data3 [file elife-82324-fig1-data3-v1.zip]

Figure 1-figure supplement 1A

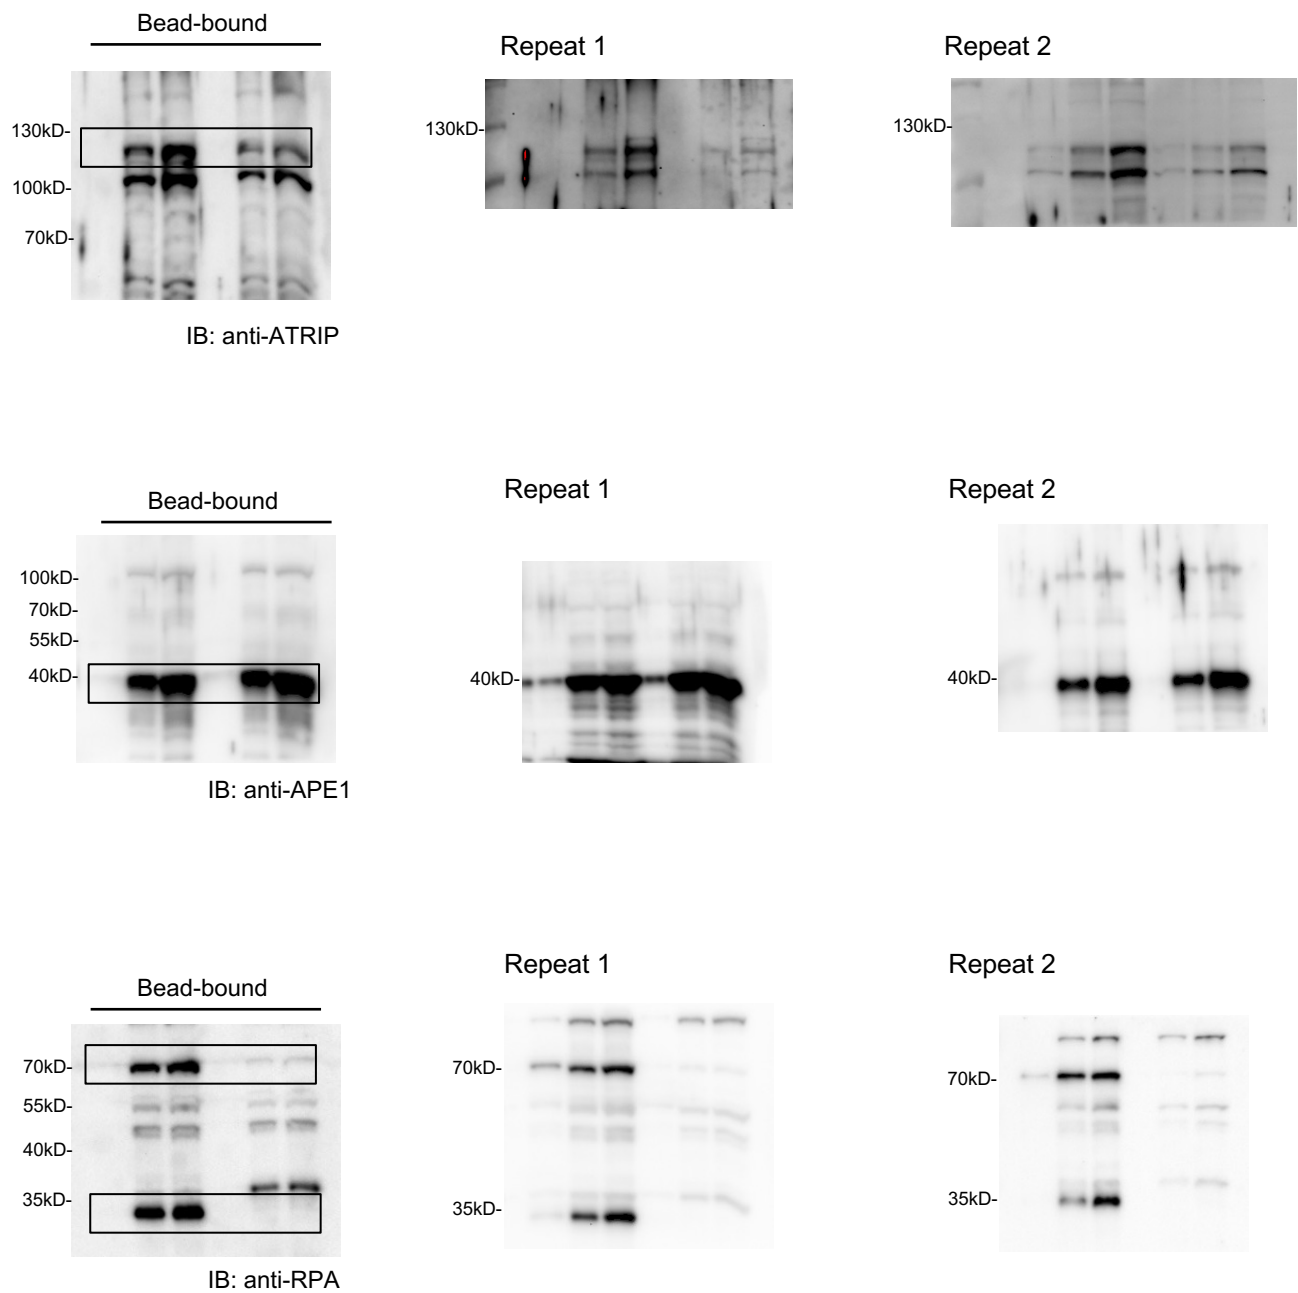

Figure 1-figure supplement 1A

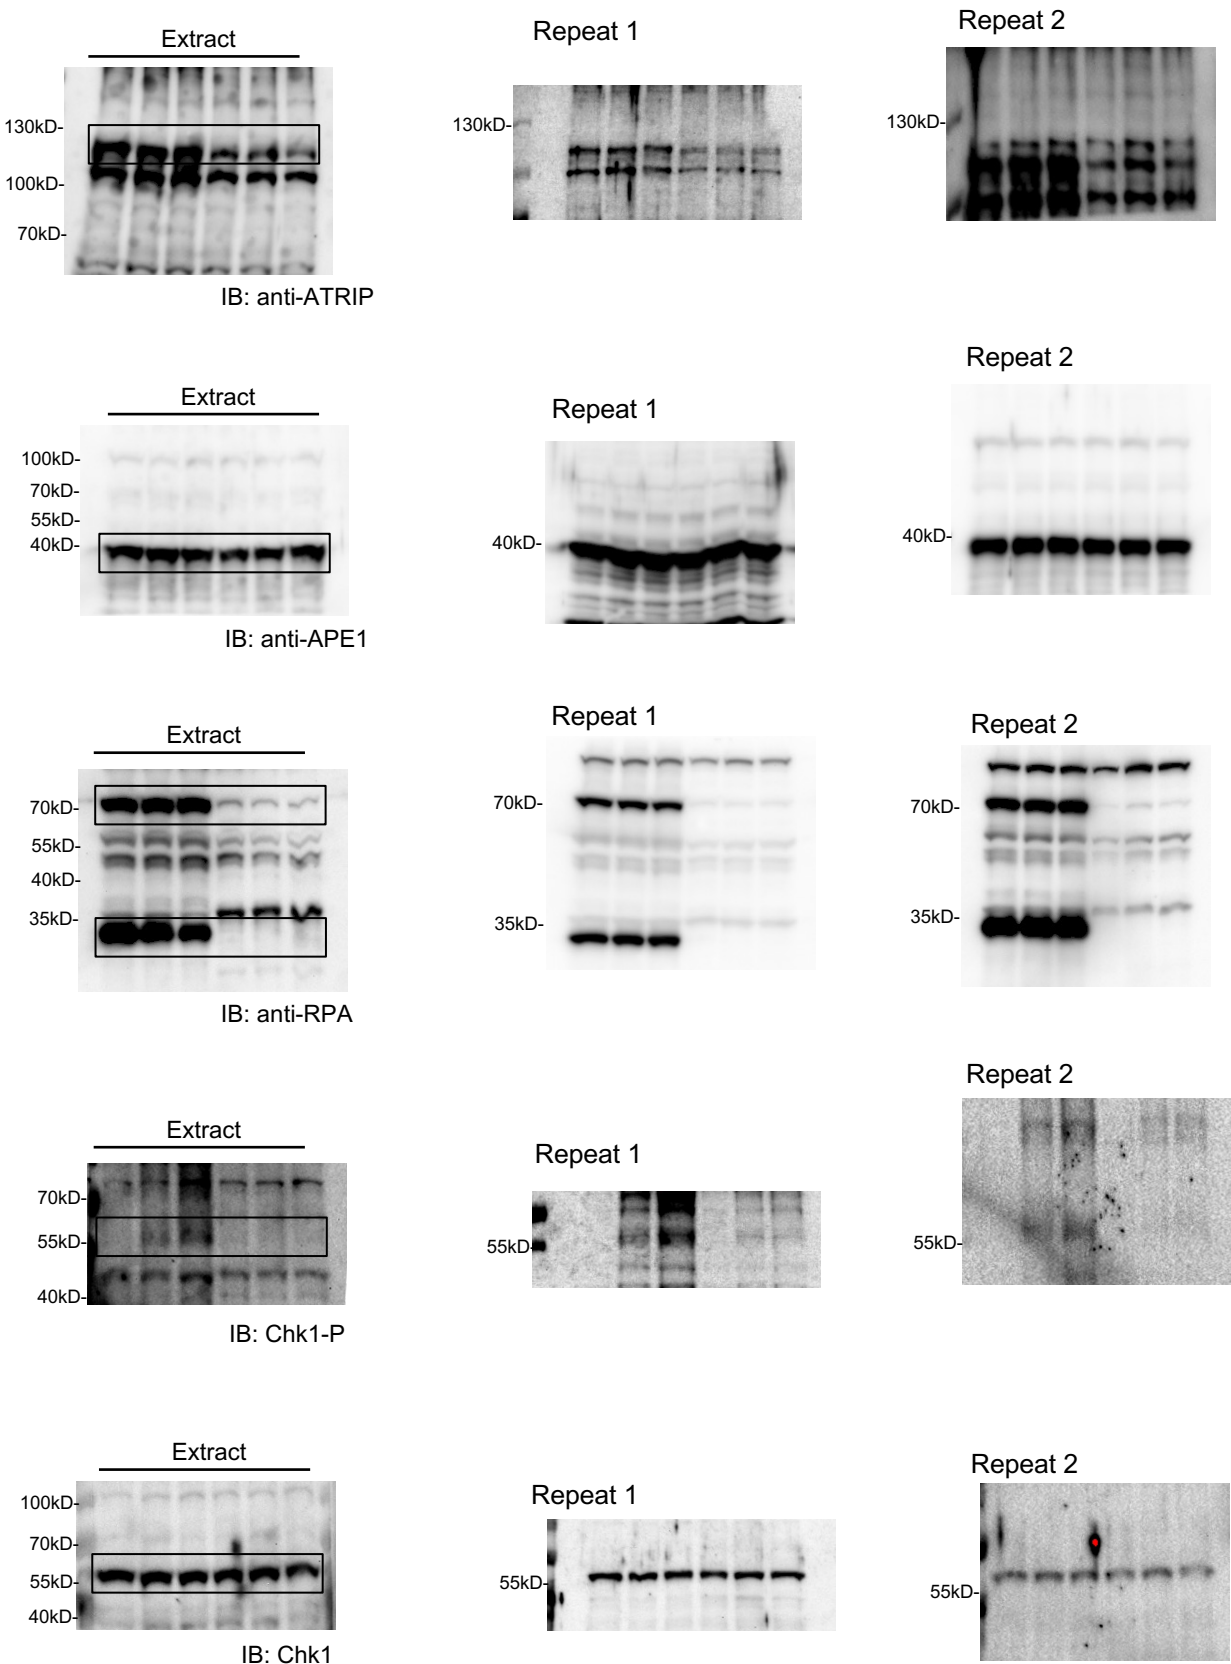

Supplement: fig1-figsupp1-data1 [file IB-data-Figure 1S1A.pdf › Figure 1-figure supplement 1-souce data 1/IB-data-Figure 1S1A.pdf]

Figure 1-figure supplement 1B

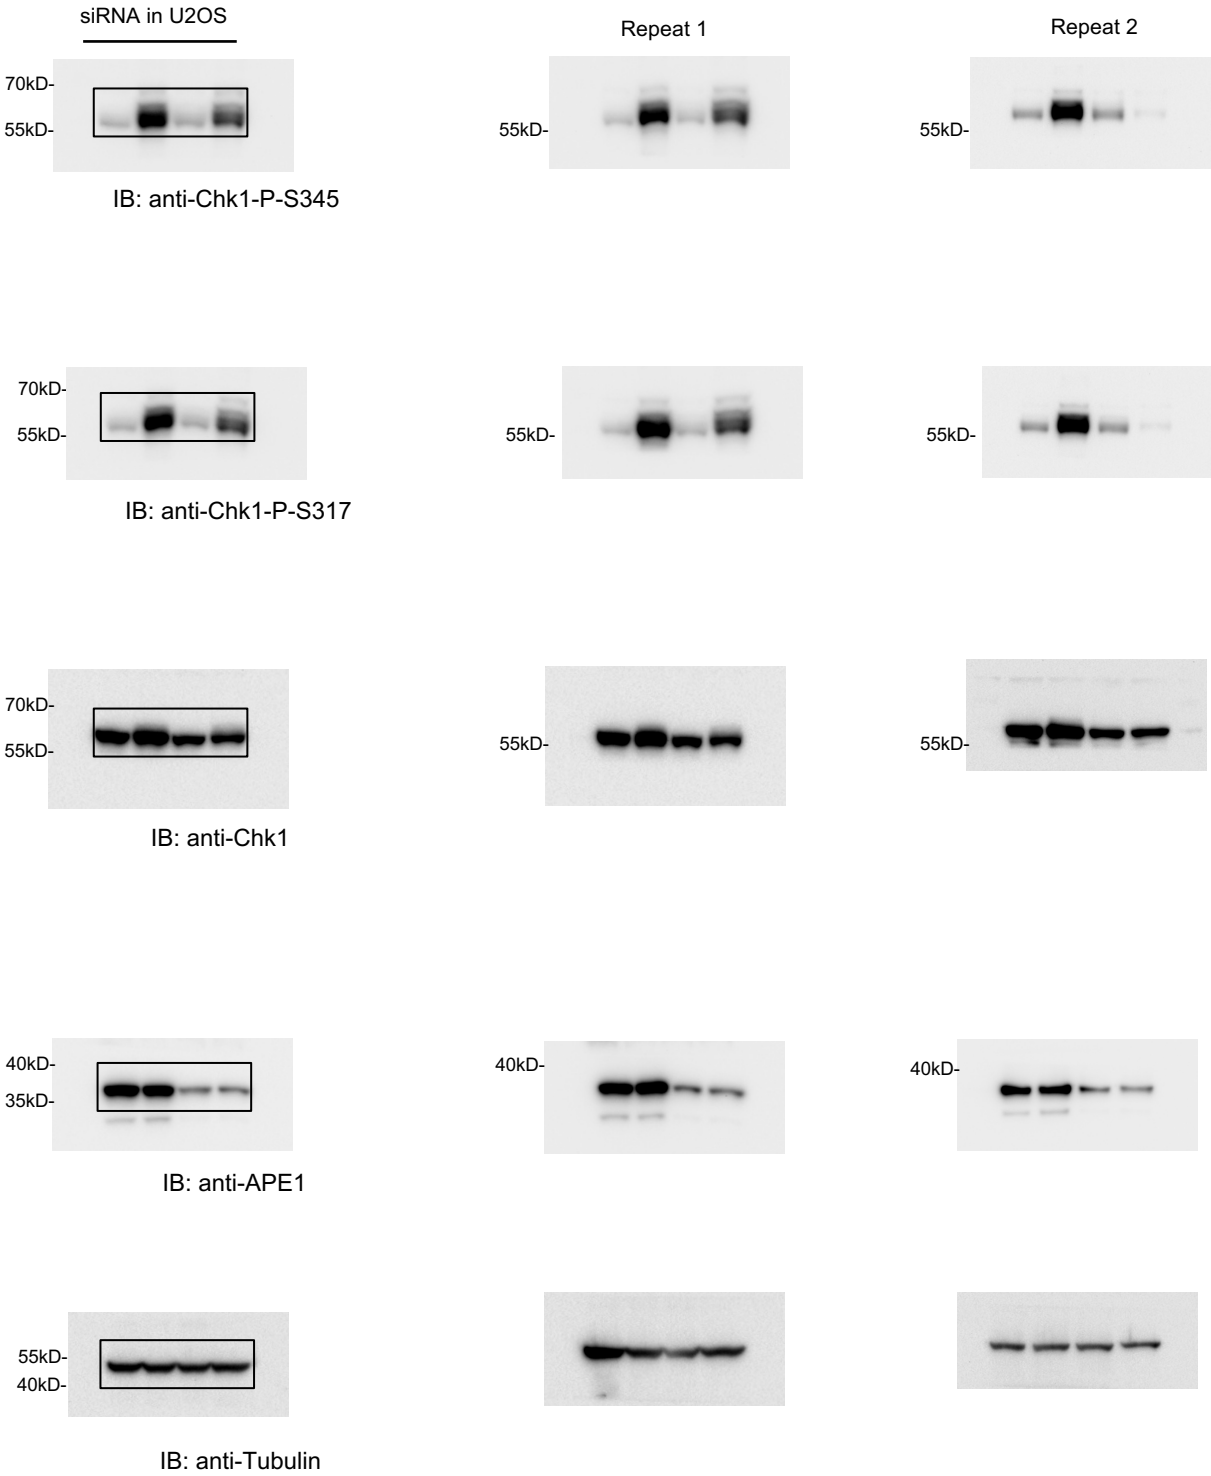

Supplement: fig1-figsupp1-data2 [file IB-data-Figure 1S1B.pdf › Figure 1-figure supplement 1-souce data 2/IB-data-Figure 1S1B.pdf]

Figure 1-figure supplement 1C

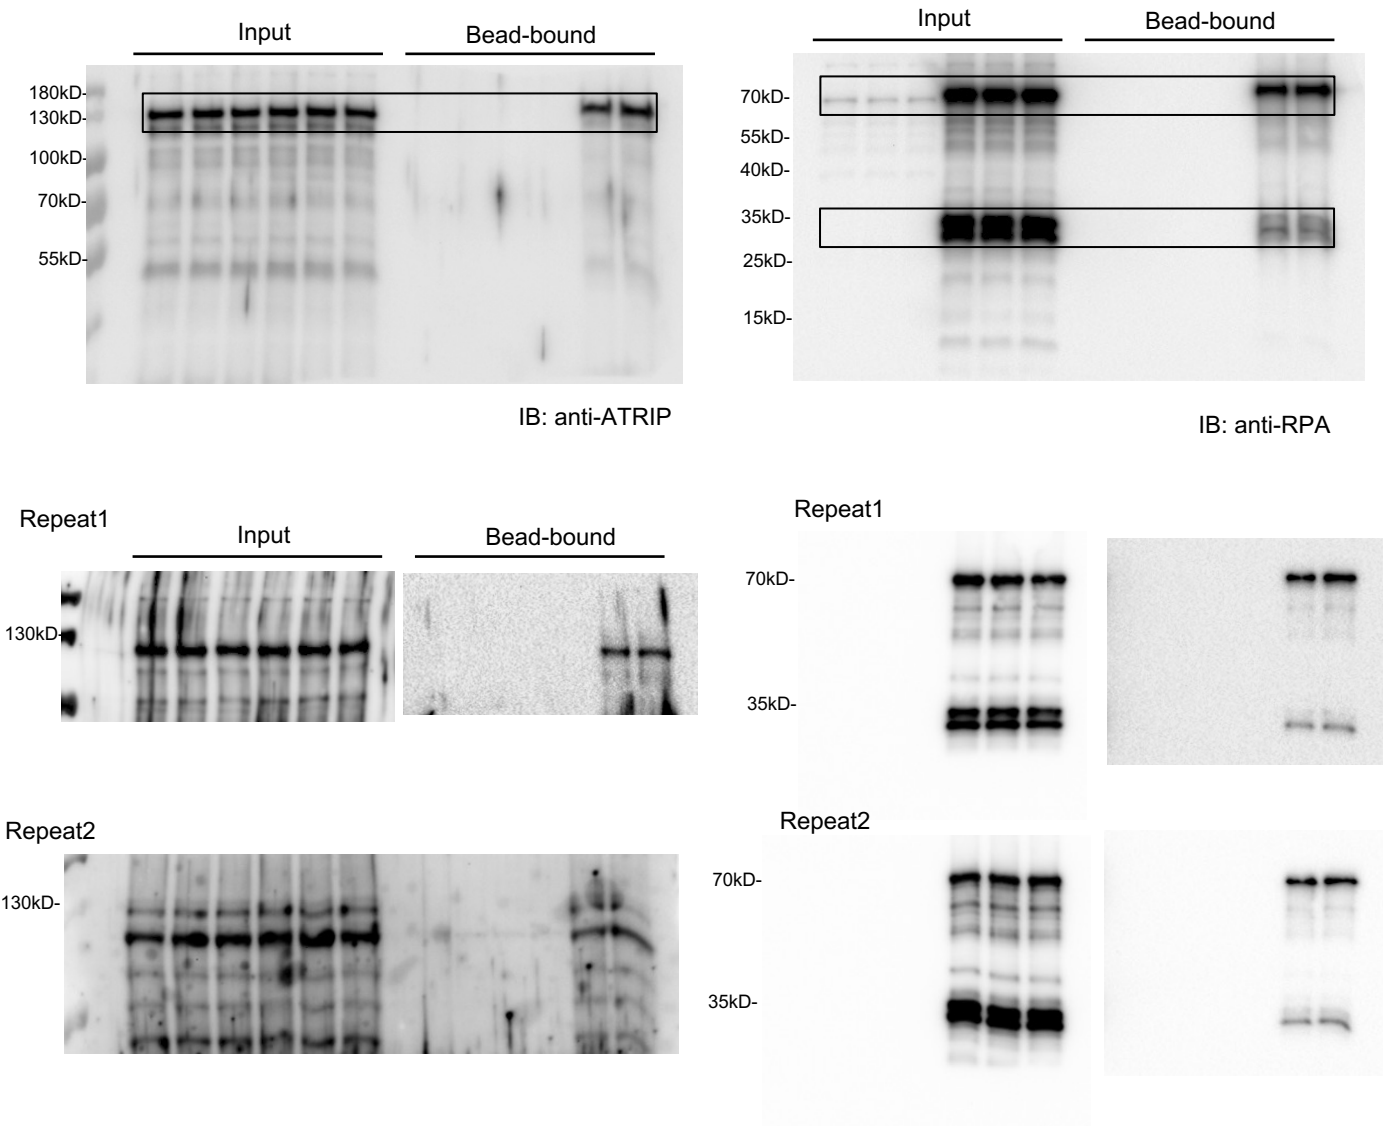

Supplement: fig1-figsupp1-data3 [file IB-data-Figure 1S1C.pdf › Figure 1-figure supplement 1-souce data 3/IB-data-Figure 1S1C.pdf]

Figure 1-figure supplement 1D

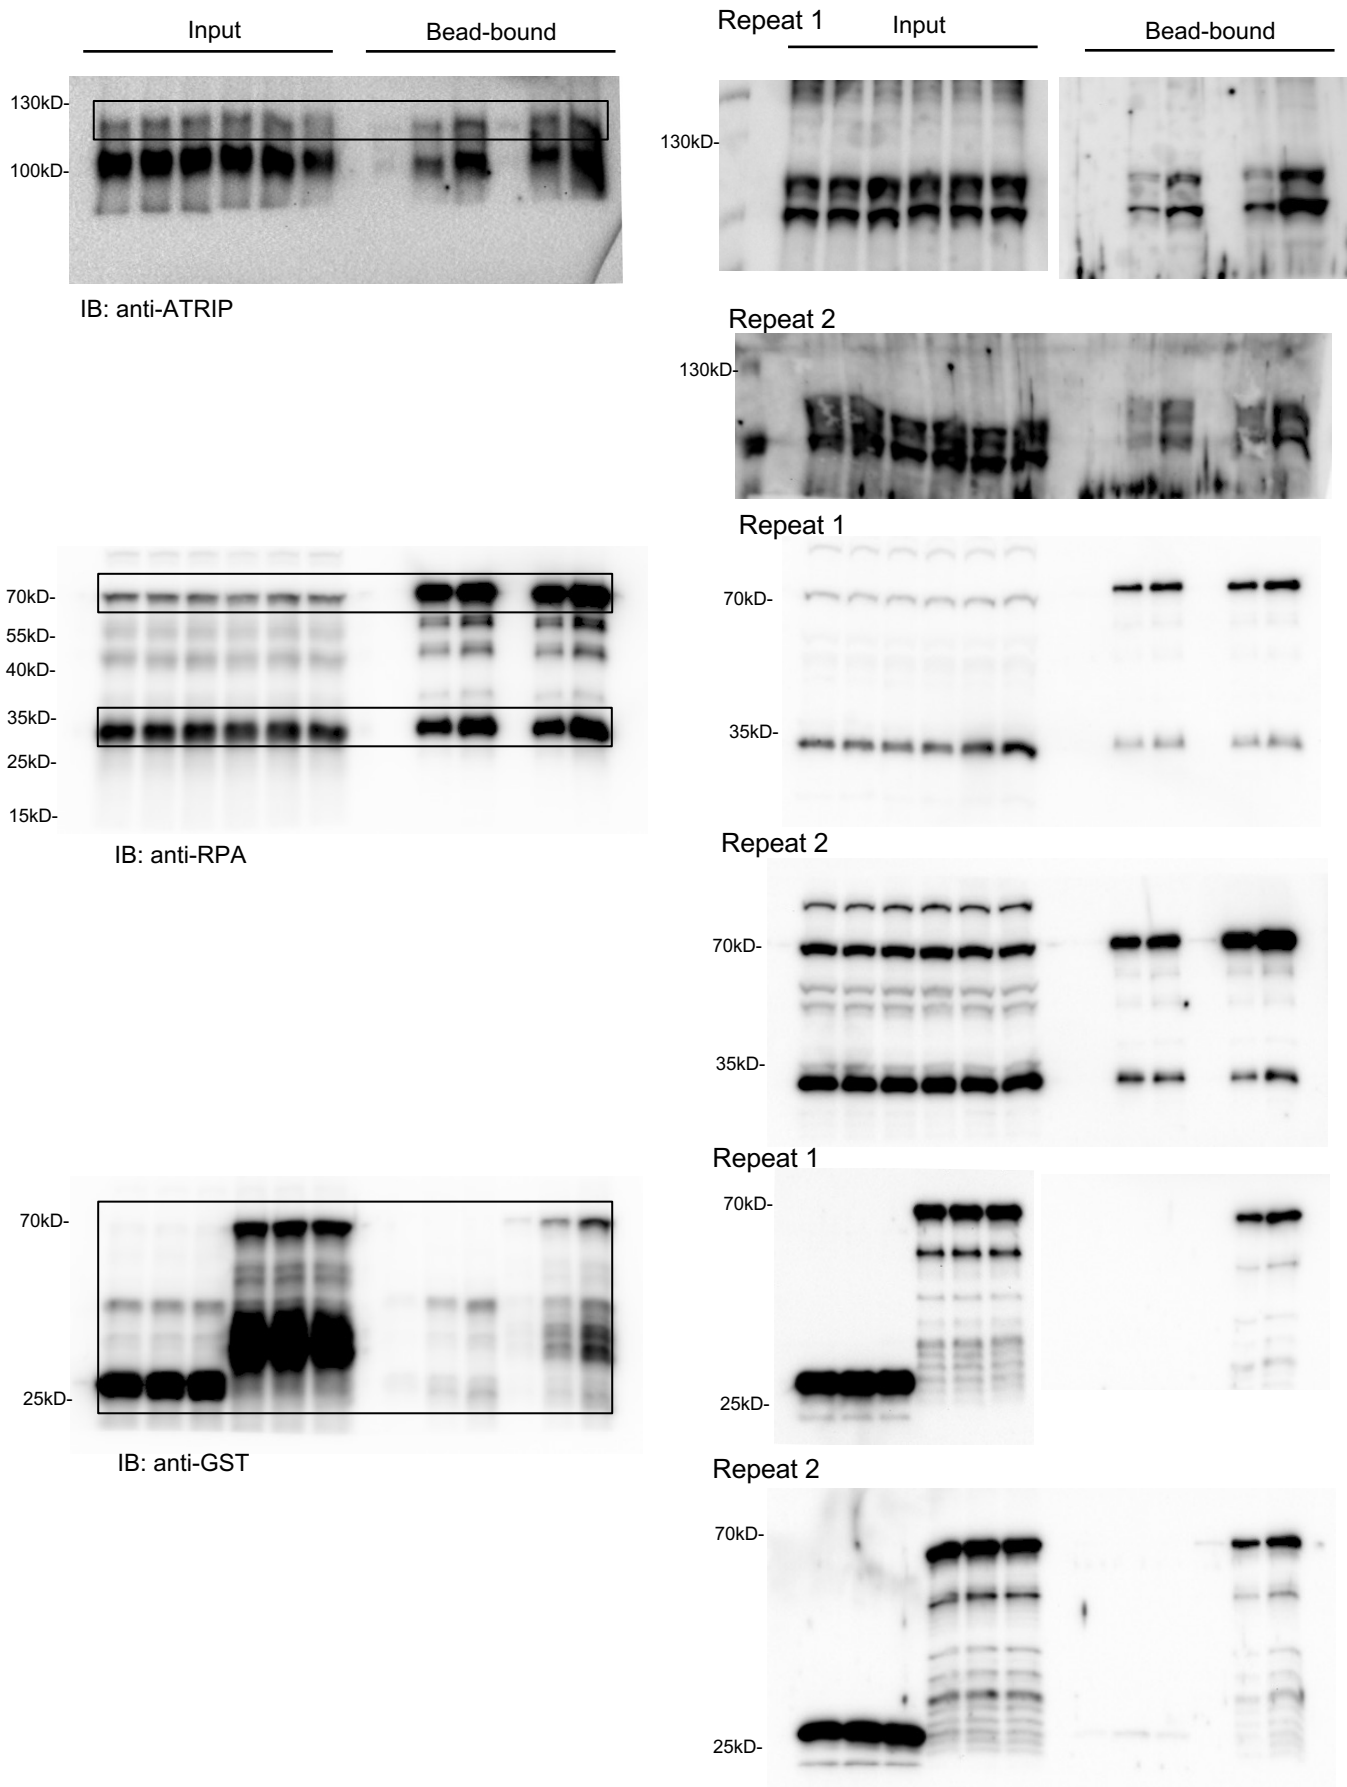

Supplement: fig1-figsupp1-data4 [file IB-data-Figure 1S1D.pdf › Figure 1-figure supplement 1-souce data 4/IB-data-Figure 1S1D.pdf]

Figure 2B

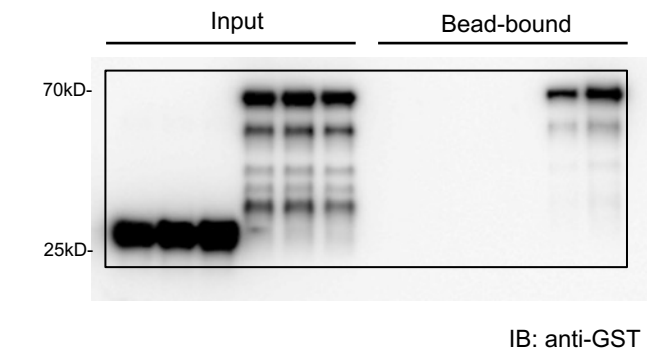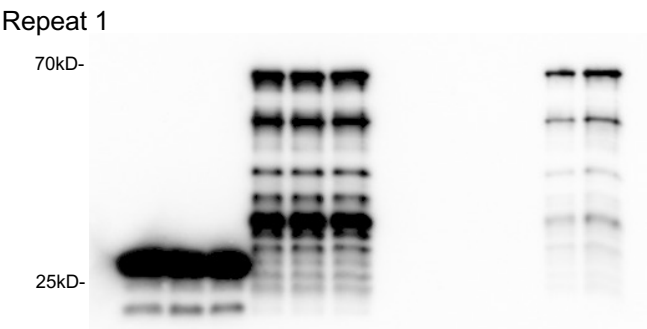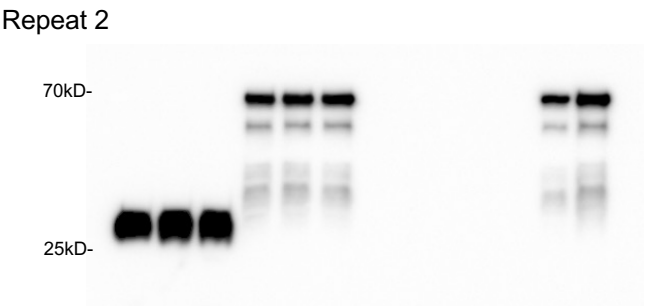

Supplement: fig2-data1 [file IB-data-Figure 2B.pdf › Figure 2-source data 1/IB-data-Figure 2B.pdf]

Figure 2C

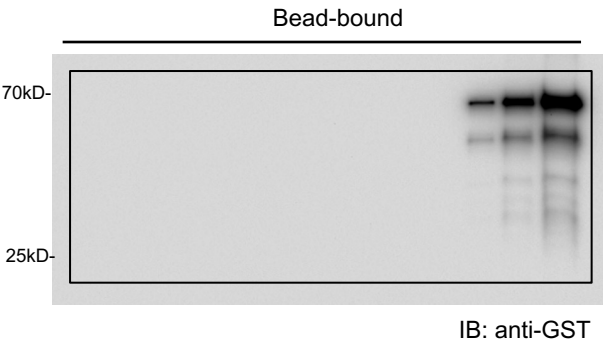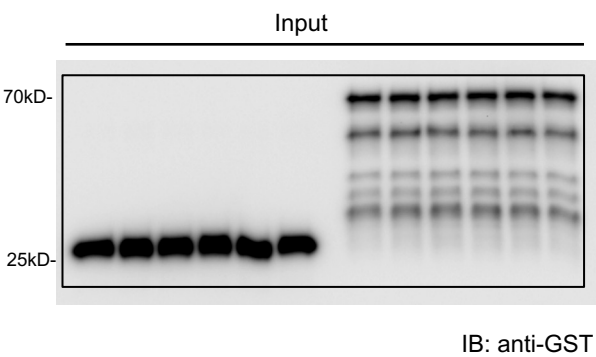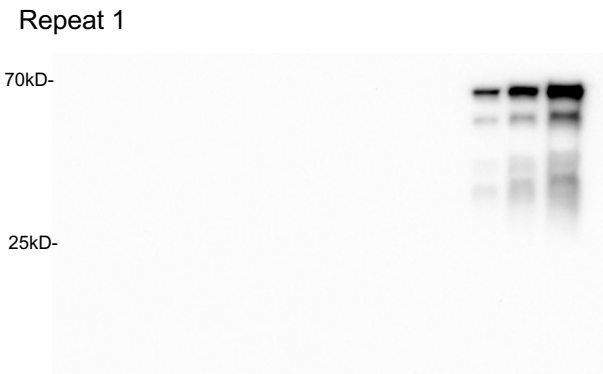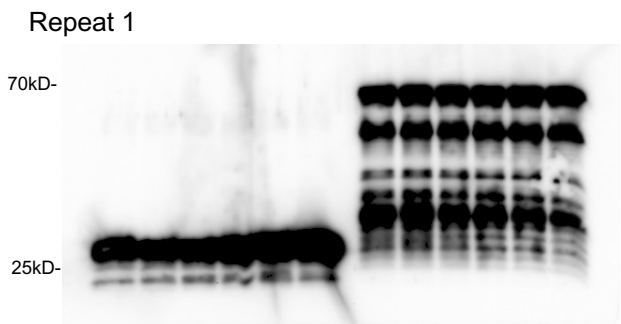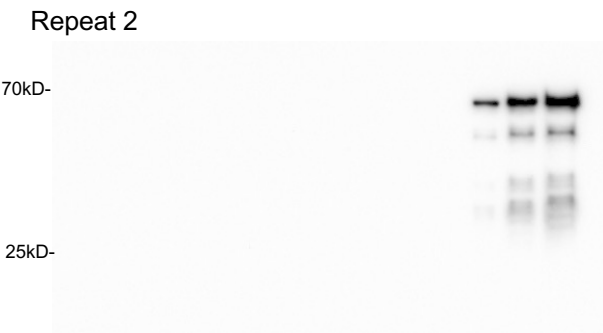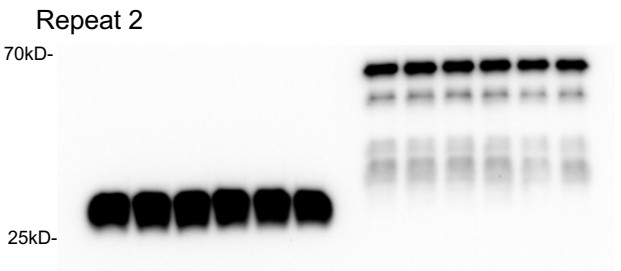

Supplement: fig2-data2 [file IB-data-Figure 2C.pdf › Figure 2-source data 2/IB-data-Figure 2C.pdf]

Figure 2D

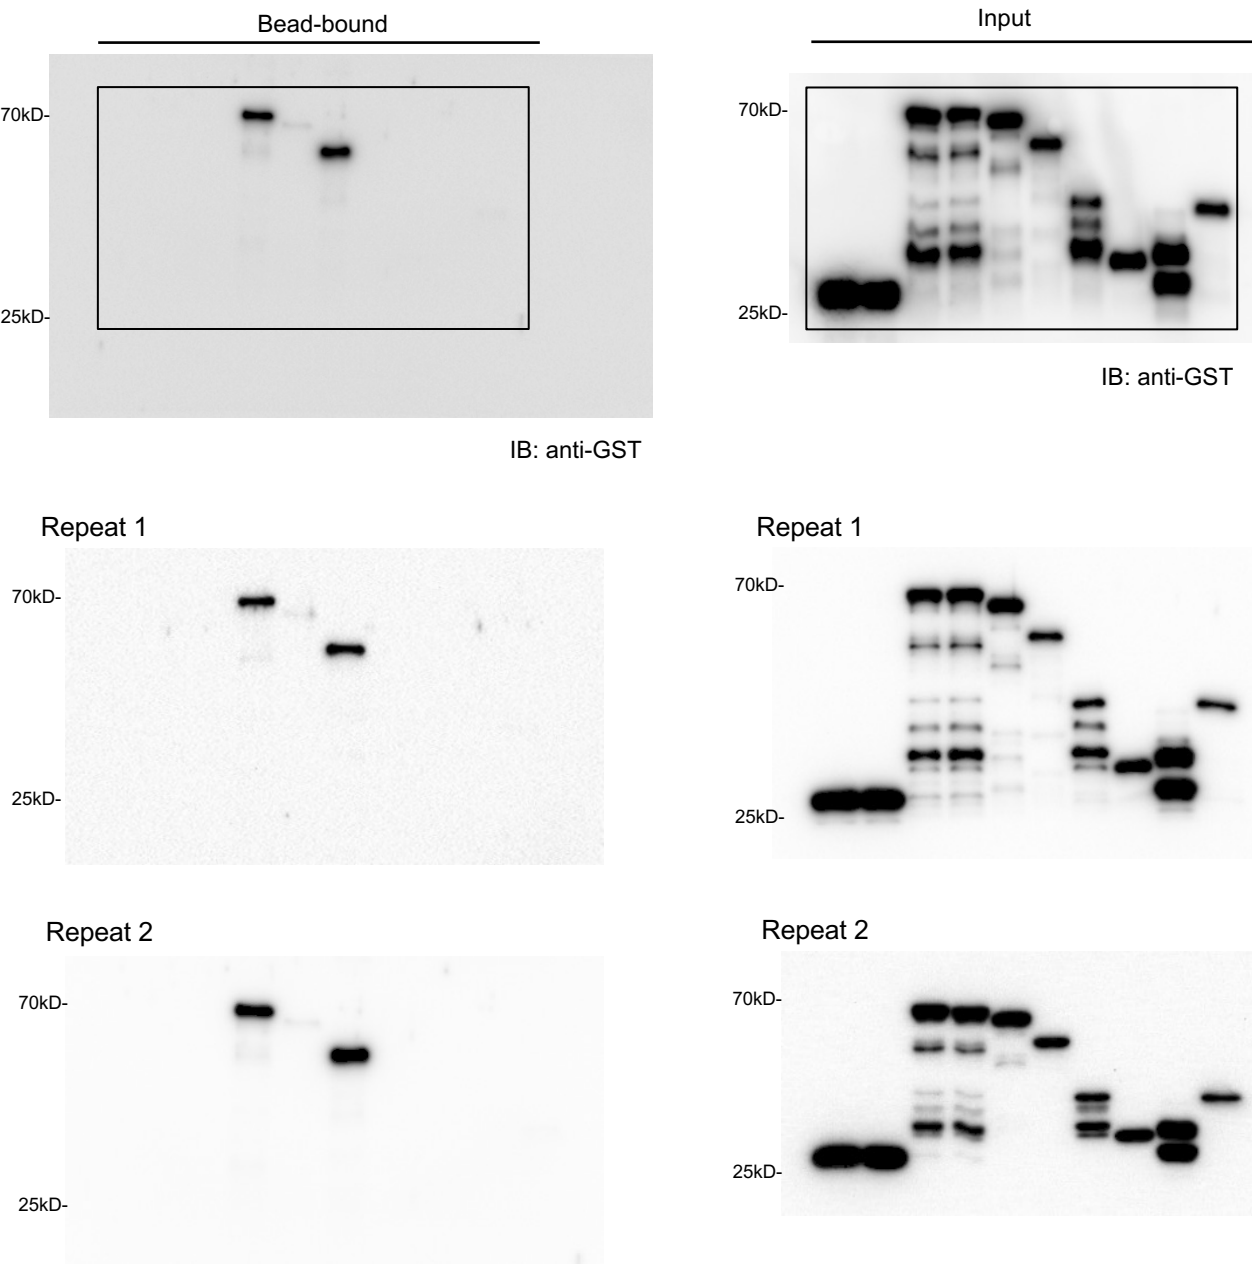

Supplement: fig2-data3 [file elife-82324-fig2-data3-v1.zip]

Figure 2-figure supplement 1

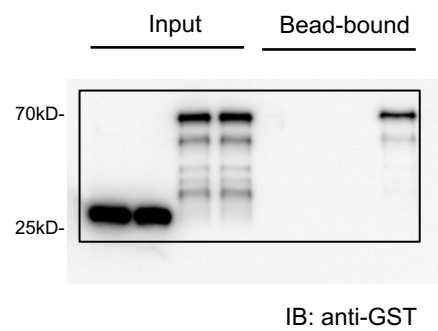

Repeat 1

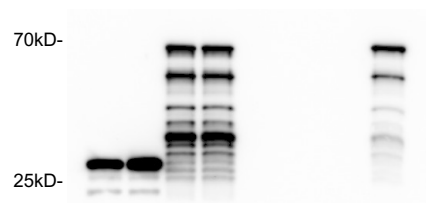

Repeat 2

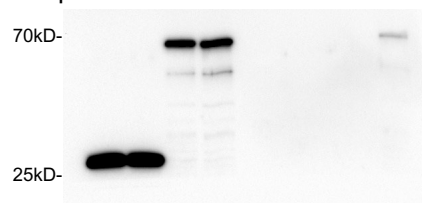

Supplement: fig2-figsupp1-data1 [file IB-data-Figure 2S1.pdf › Figure 2-figure supplement 1-souce data 1/IB-data-Figure 2S1.pdf]

Figure 3A

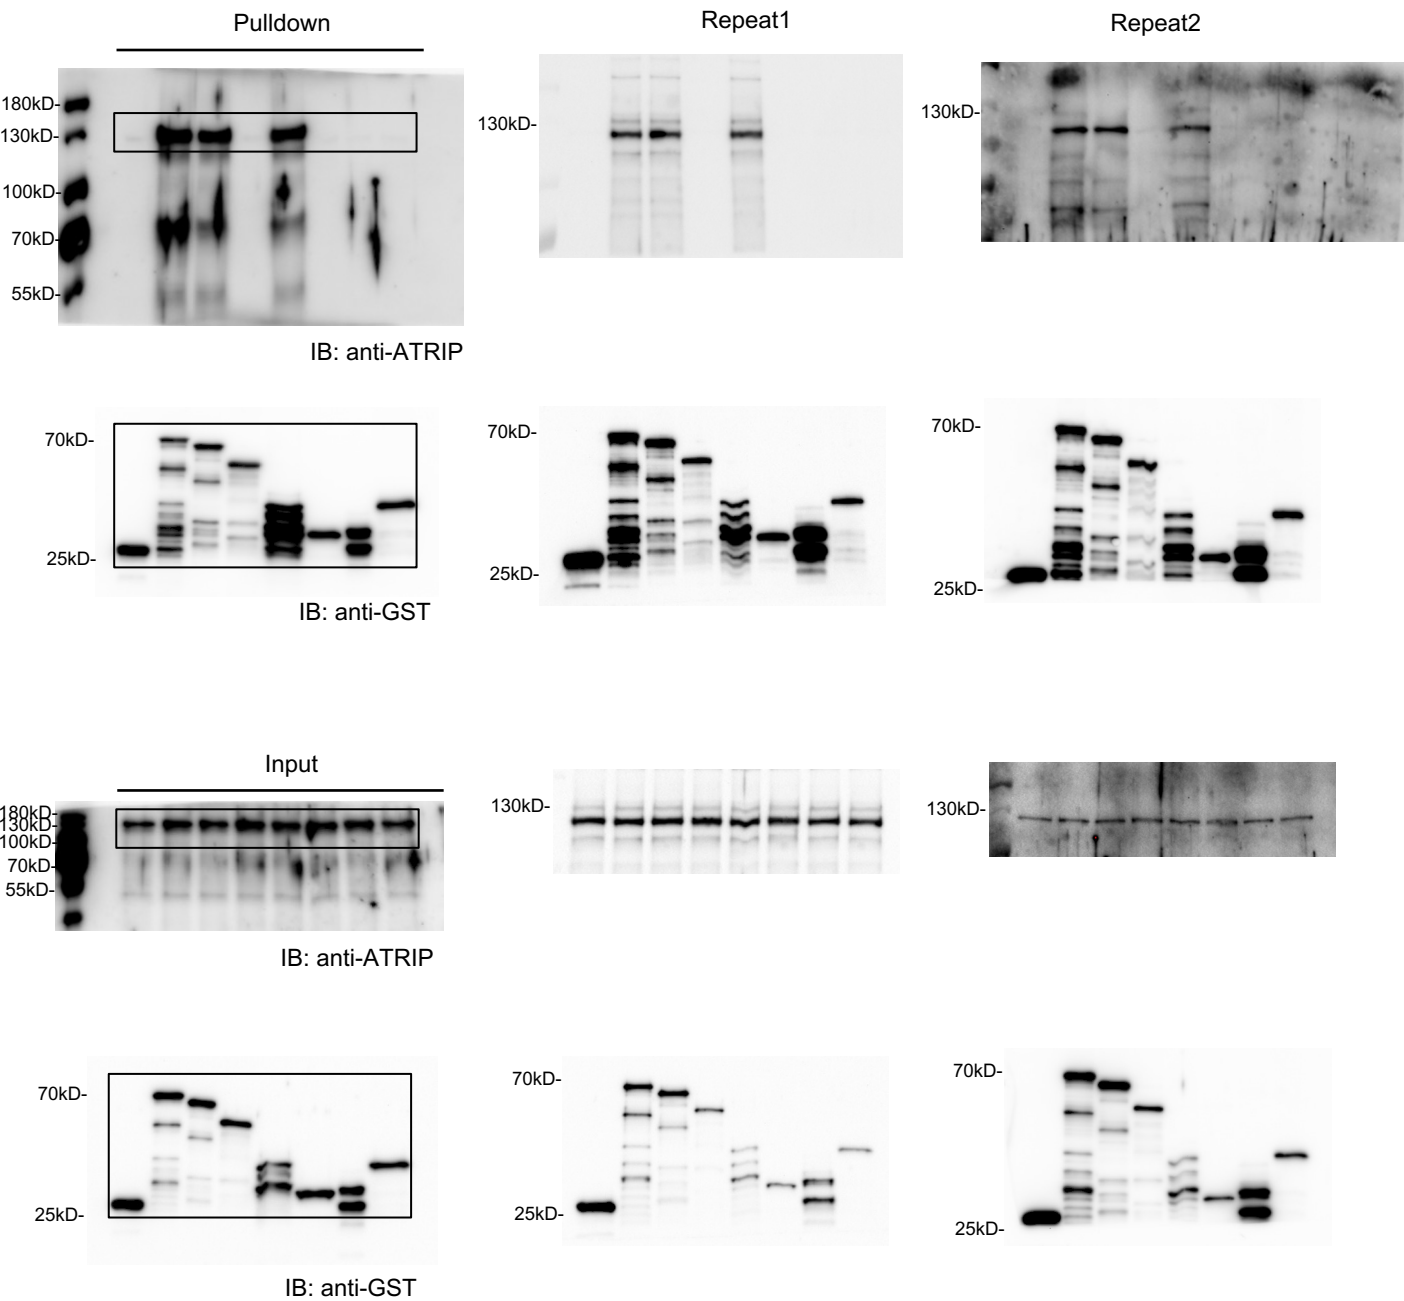

Supplement: fig3-data1 [file IB-data-Figure 3A.pdf › Figure 3-source data 1/IB-data-Figure 3A.pdf]

Figure 3B

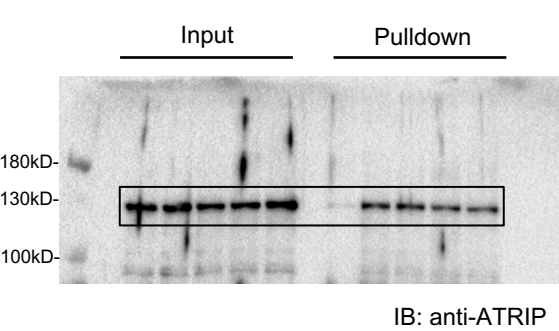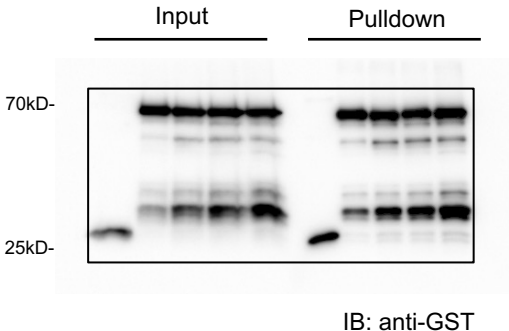

Repeat 1

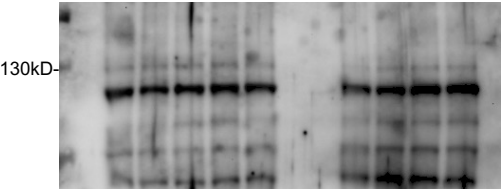

Repeat 1

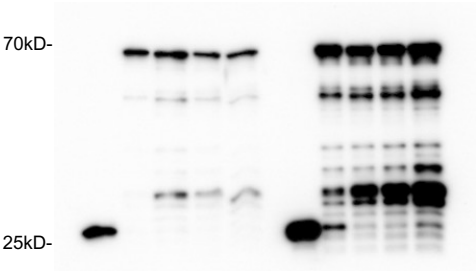

Repeat 2

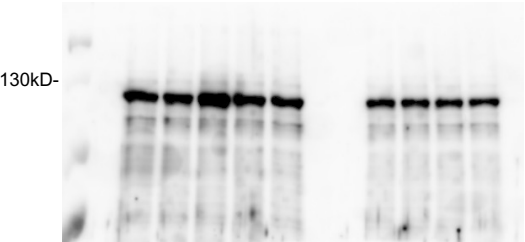

Repeat 2

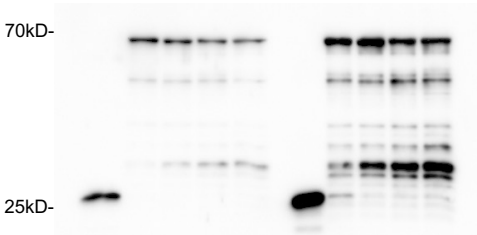

Supplement: fig3-data2 [file IB-data-Figure 3B.pdf › Figure 3-source data 2/IB-data-Figure 3B.pdf]

Figure 3C

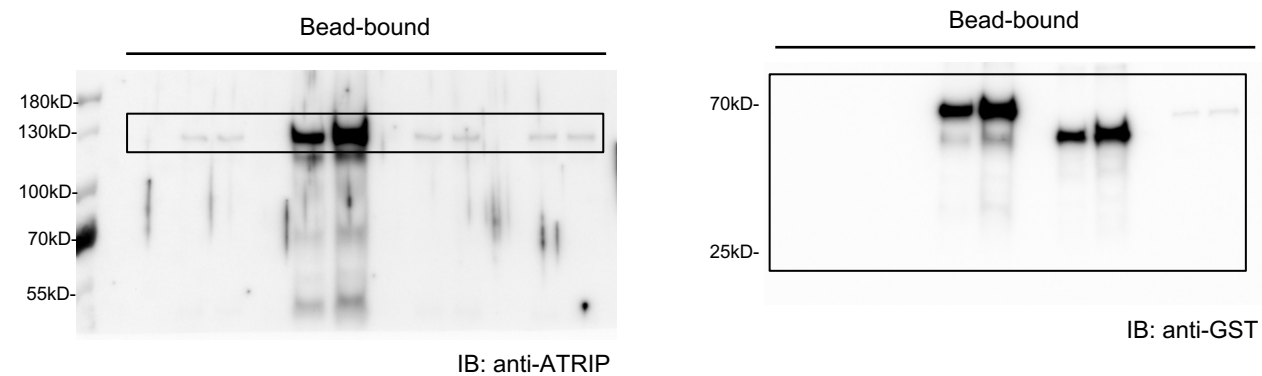

Repeat 1

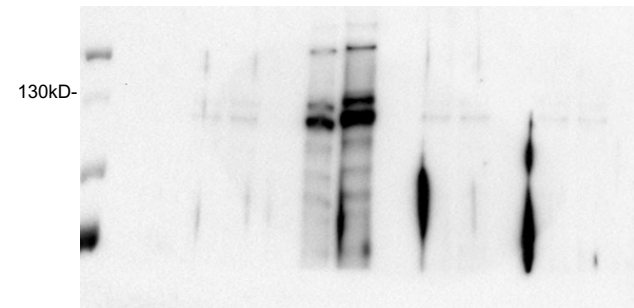

Repeat 1

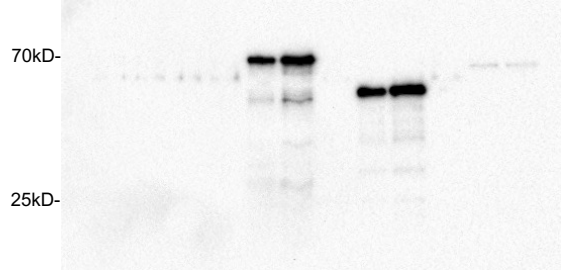

Repeat 2

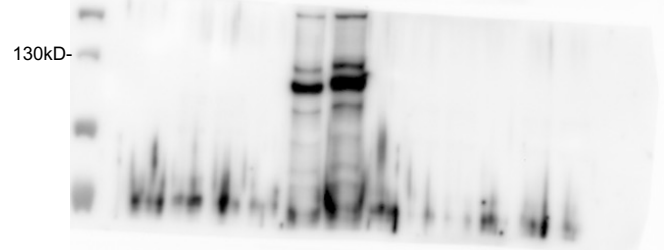

Repeat 2

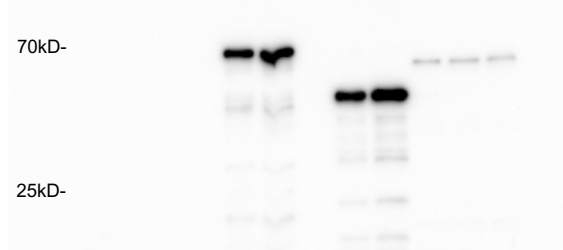

Figure 3C

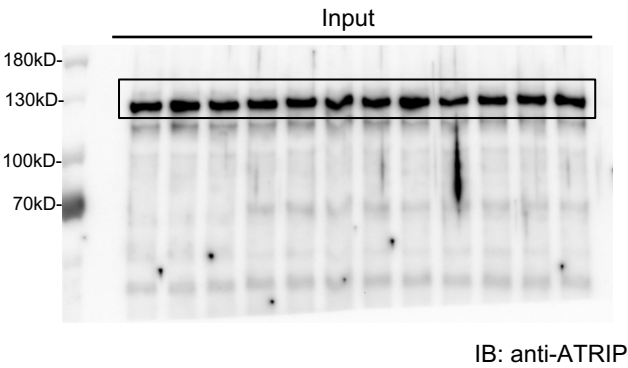

Repeat 1

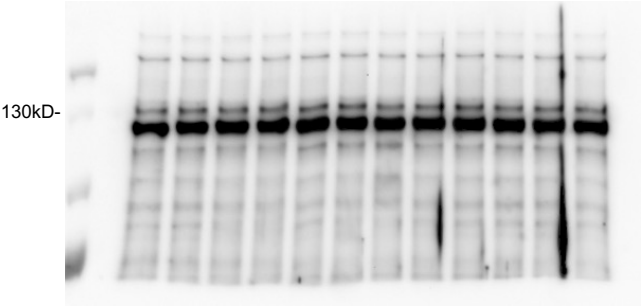

Repeat 2

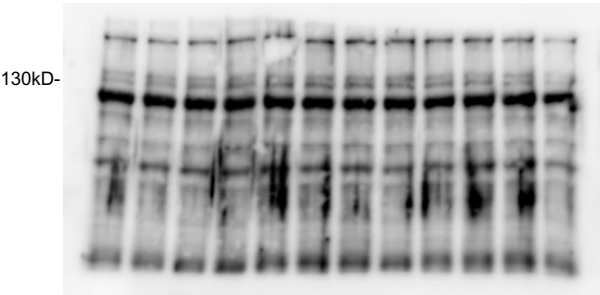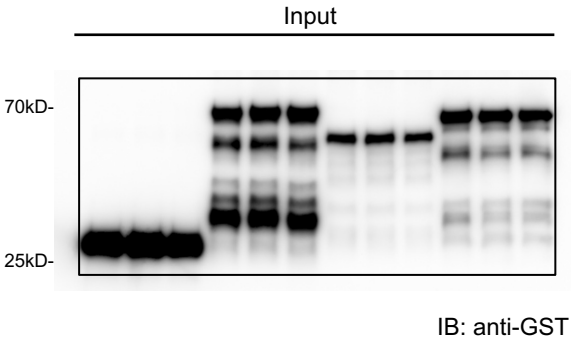

Repeat 1

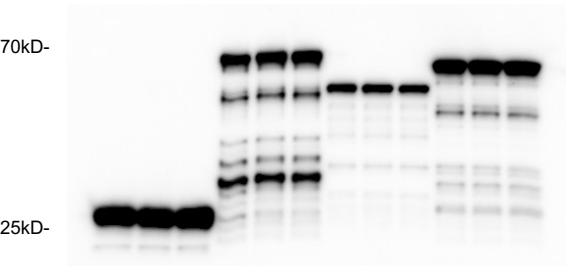

Repeat 2

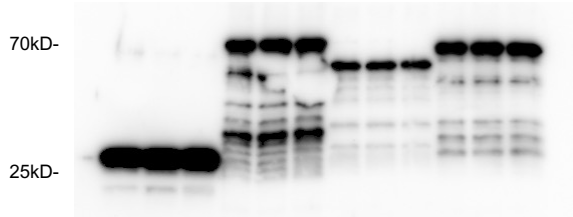

Supplement: fig3-data3 [file IB-data-Figure 3C.pdf › Figure 3-source data 3/IB-data-Figure 3C.pdf]

Figure 3D

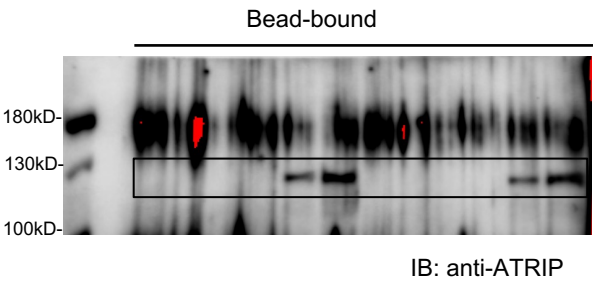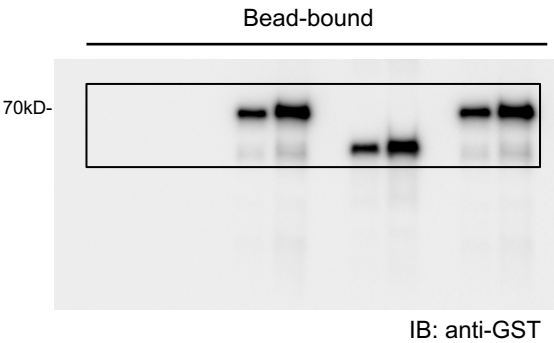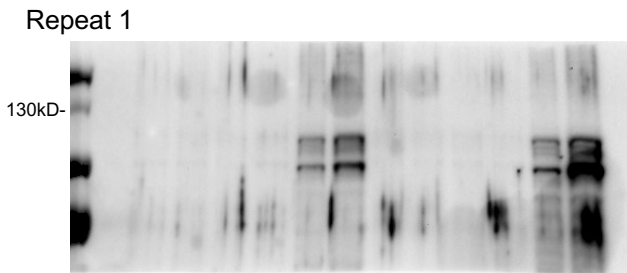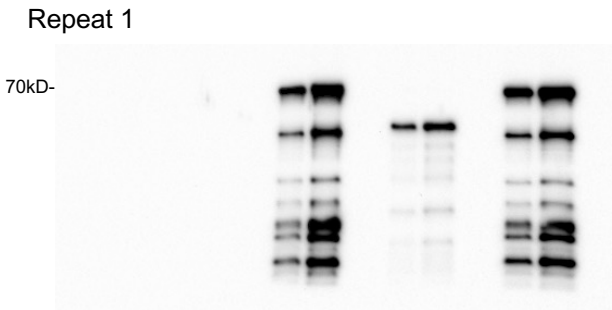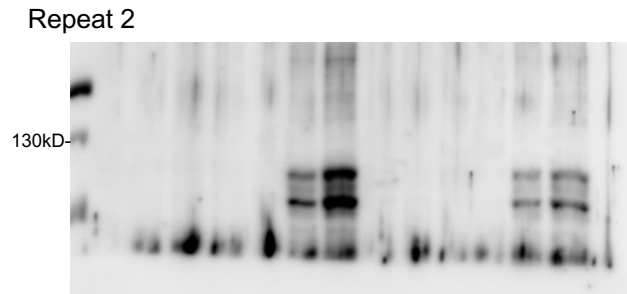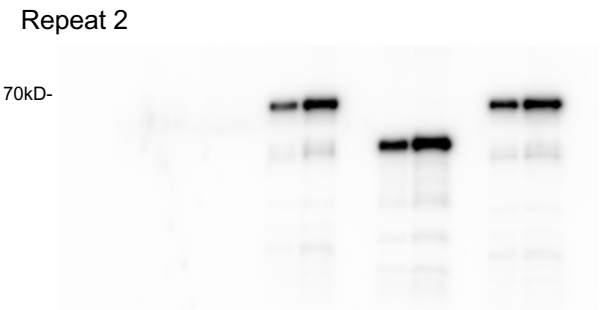

Figure 3D

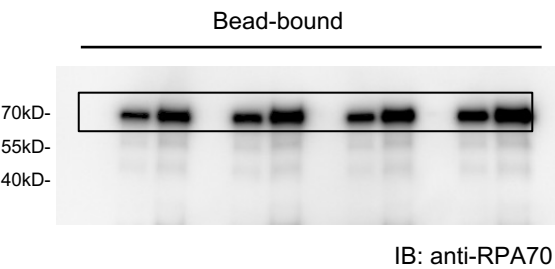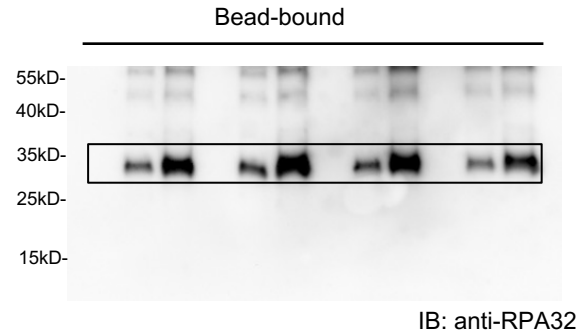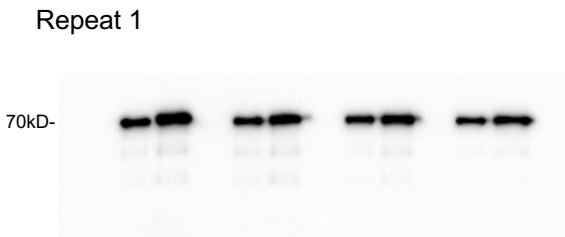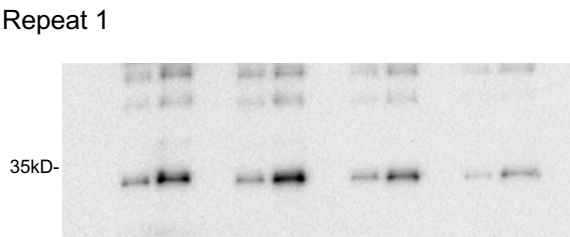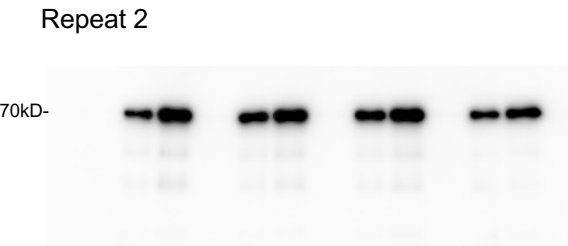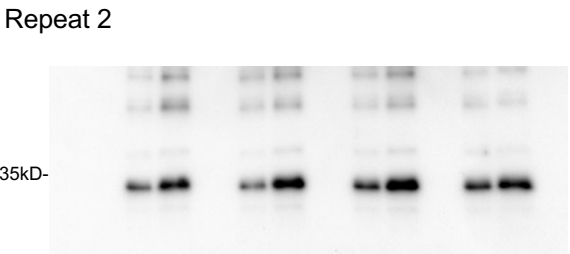

Figure 3D

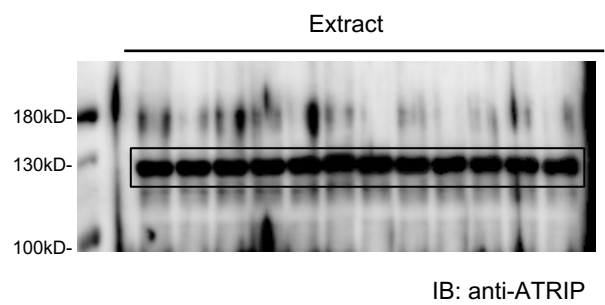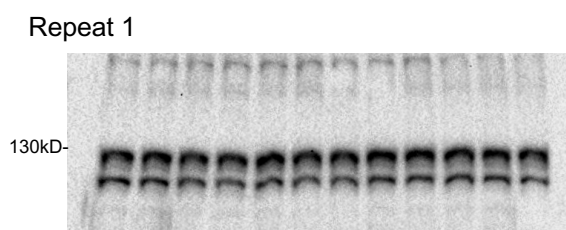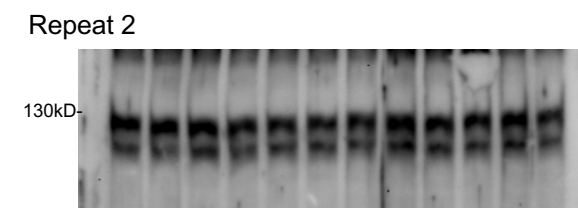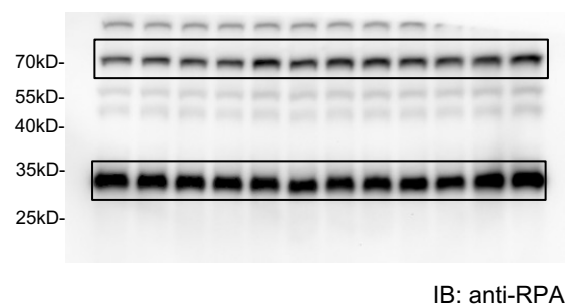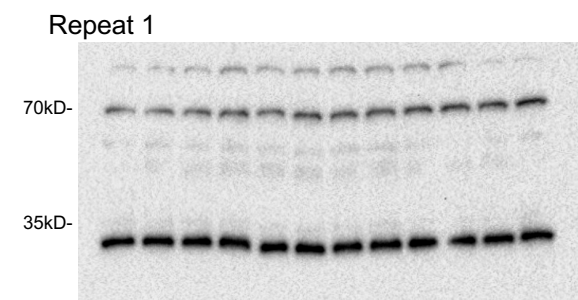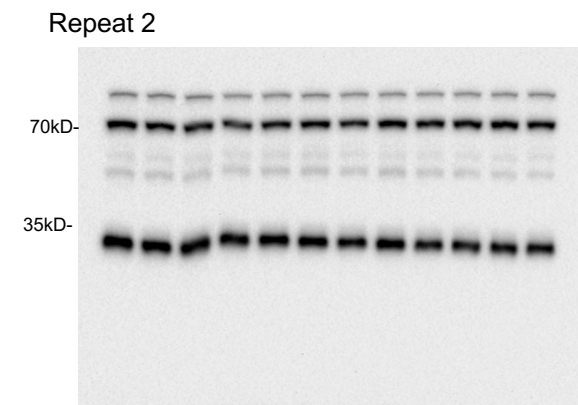

Figure 3D

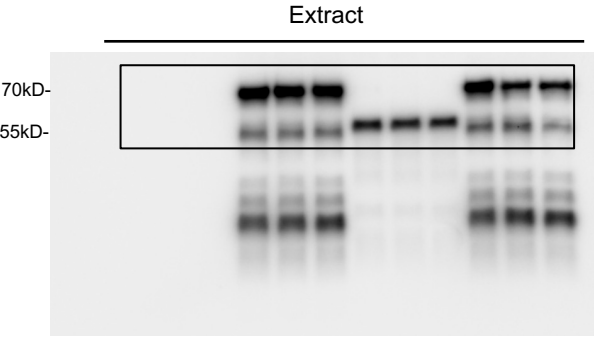

IB: anti-GST

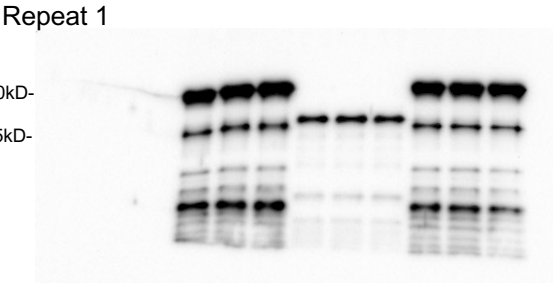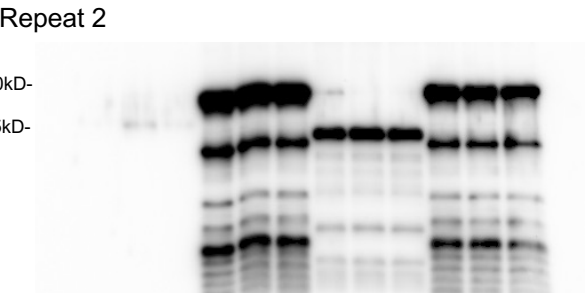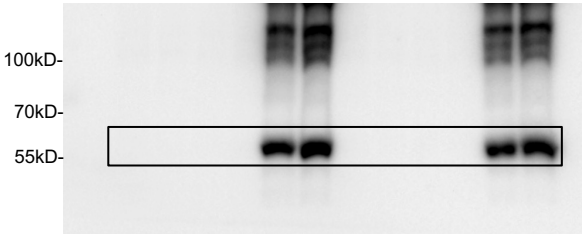

IB: Chk1-P

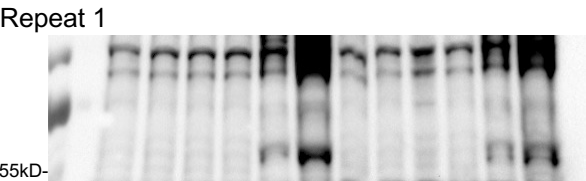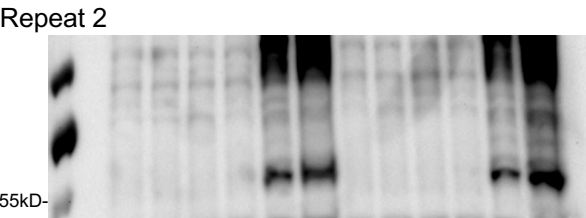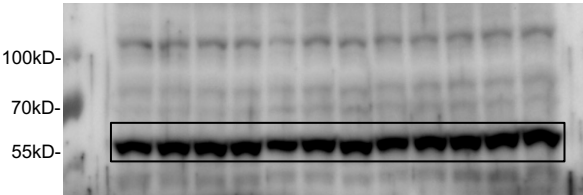

IB: Chk1

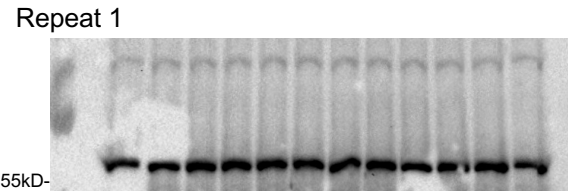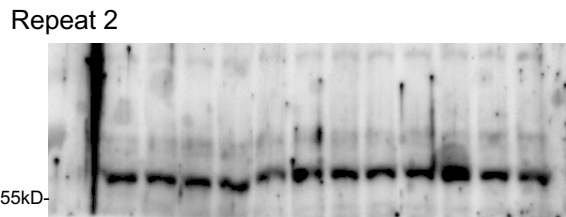

Supplement: fig3-data4 [file elife-82324-fig3-data4-v1.zip]

Figure 4A

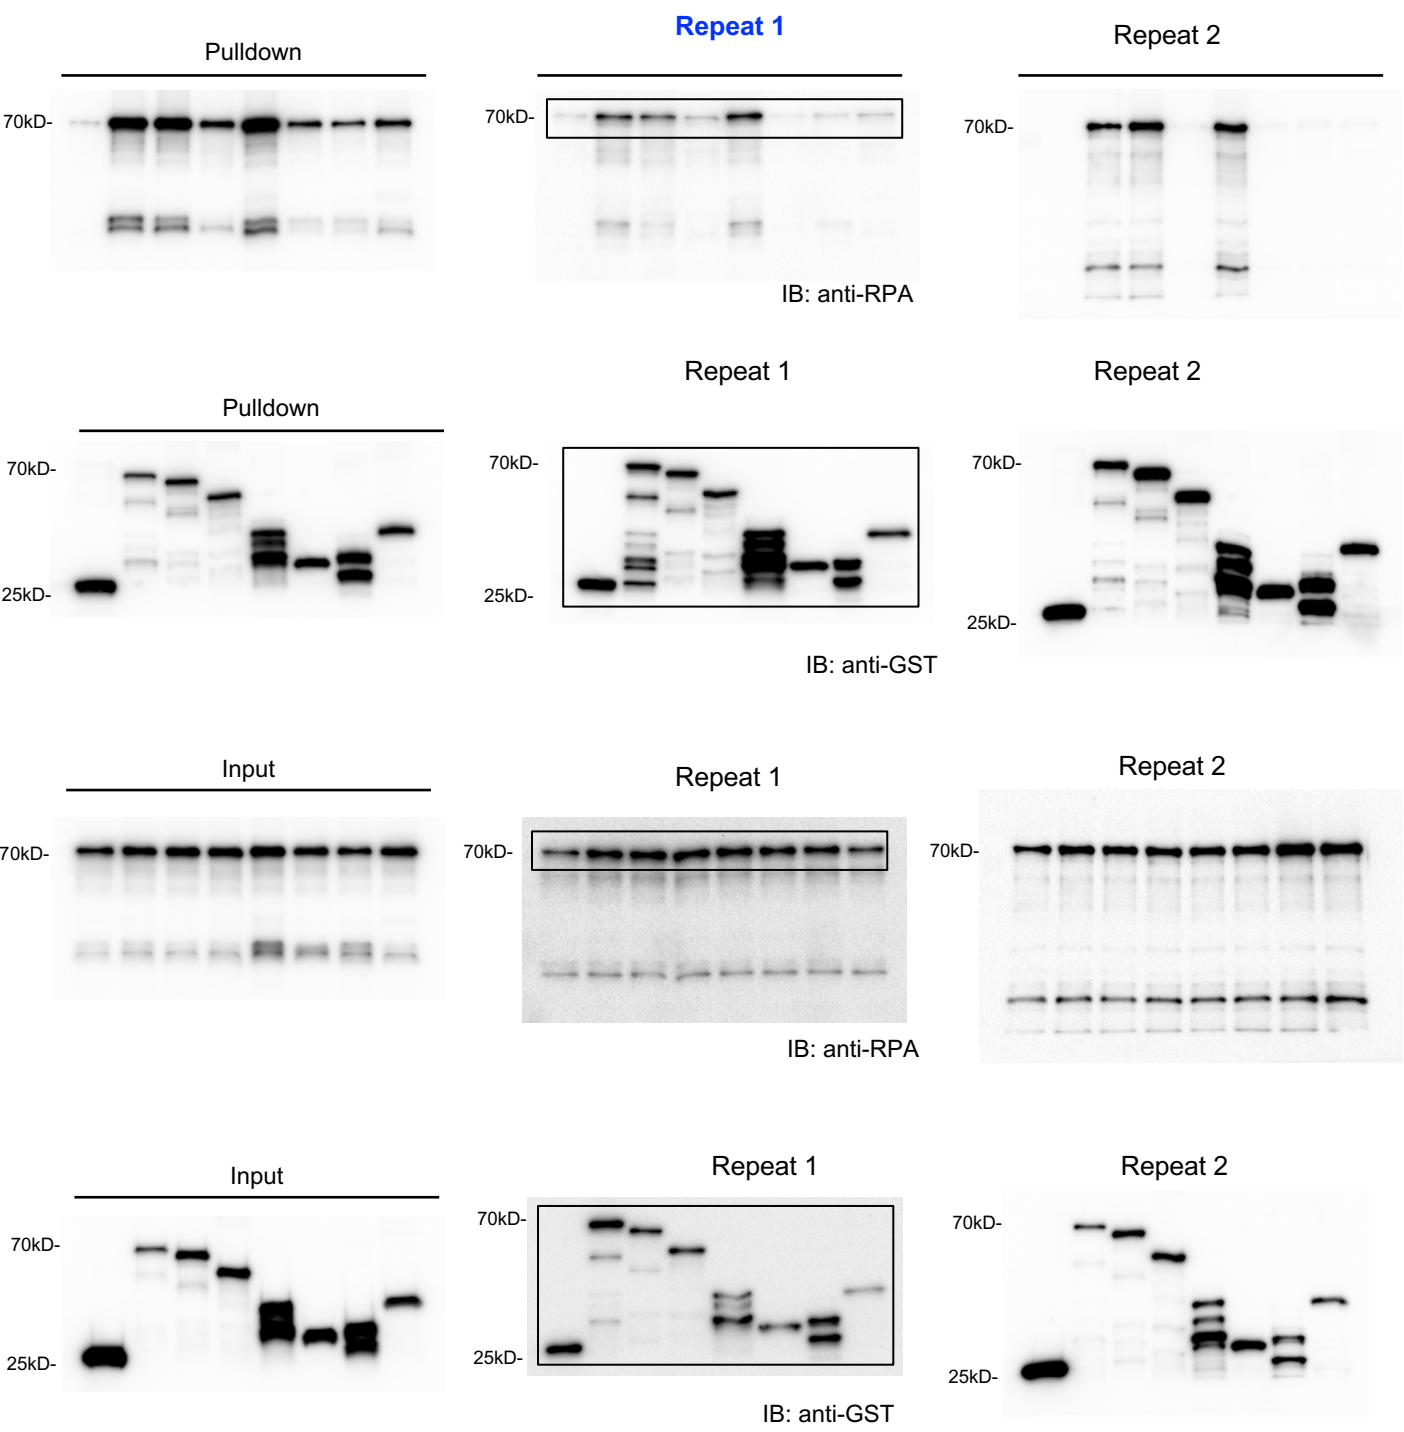

Supplement: fig4-data1 [file IB-data-Figure 4A.pdf › Figure 4-source data 1/IB-data-Figure 4A.pdf]

Figure 4C

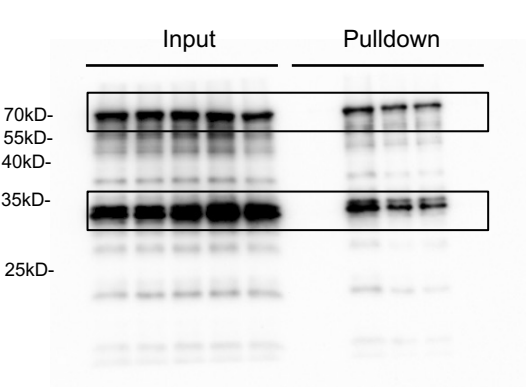

IB: anti-RPA

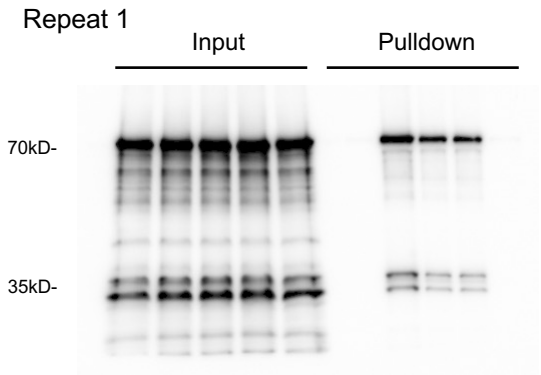

Repeat 2

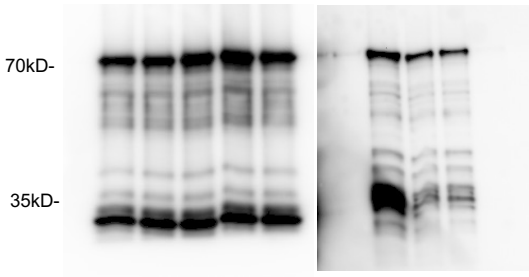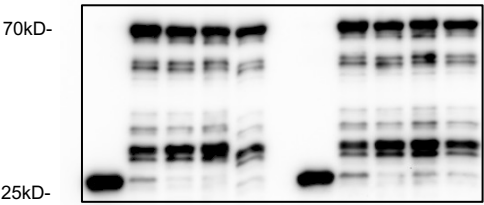

IB: anti-GST

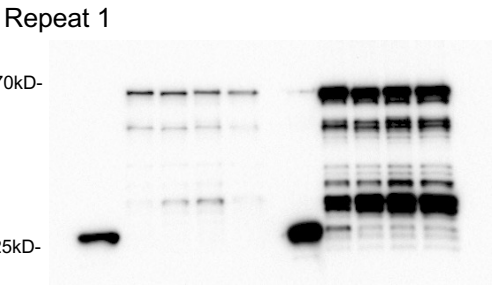

Repeat 2

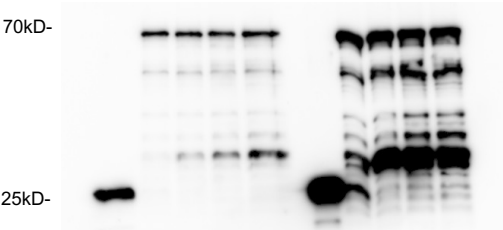

Supplement: fig4-data2 [file elife-82324-fig4-data2-v1.zip]

Figure 4D

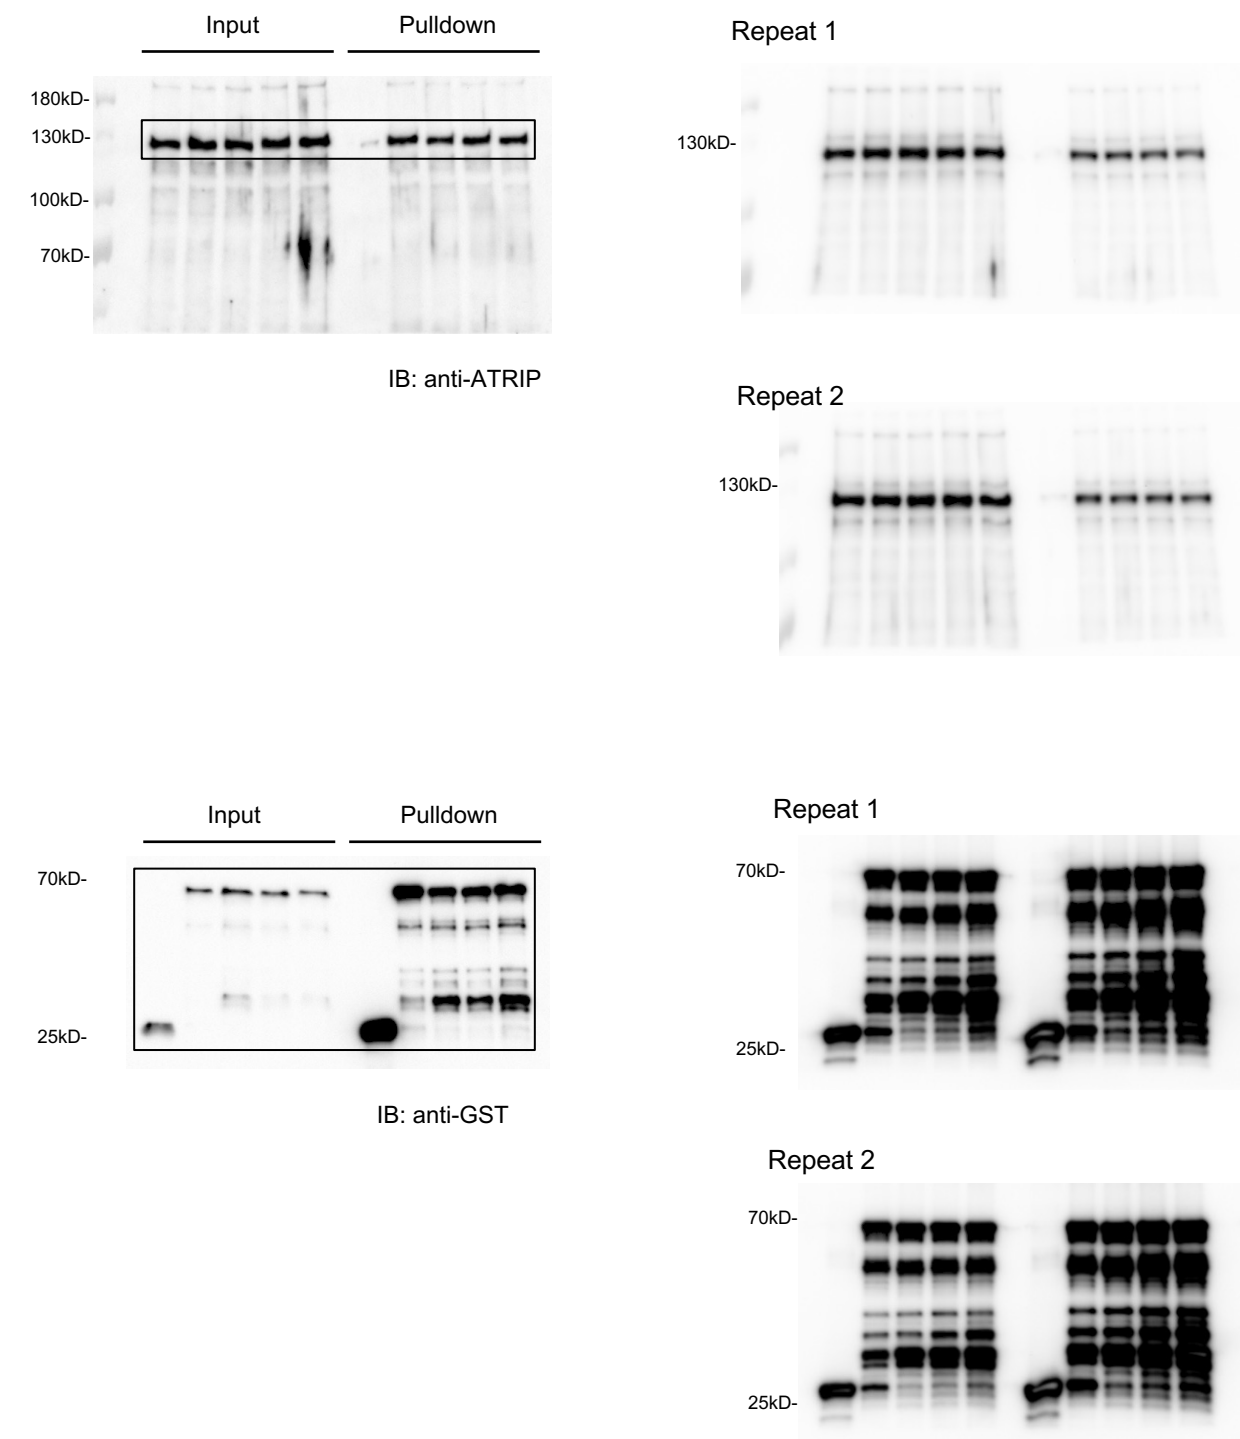

Supplement: fig4-data3 [file elife-82324-fig4-data3-v1.zip]

Figure 4E

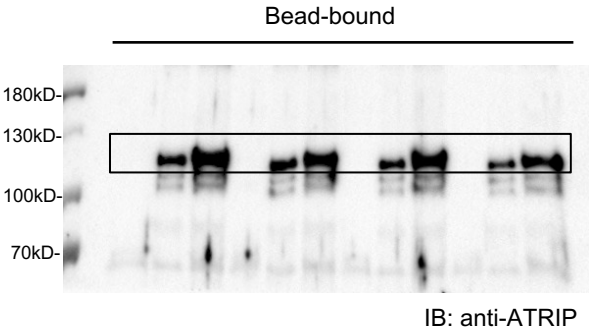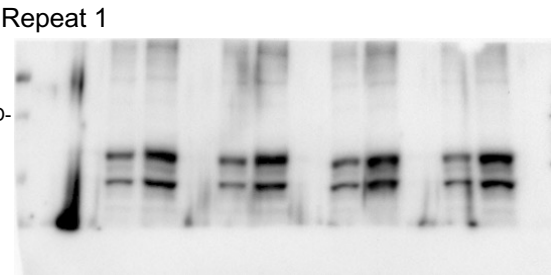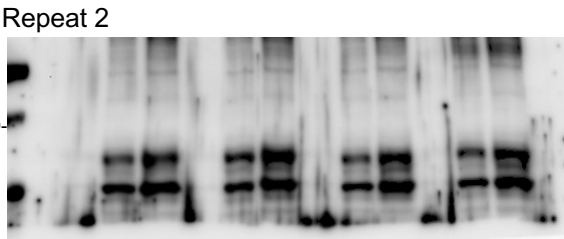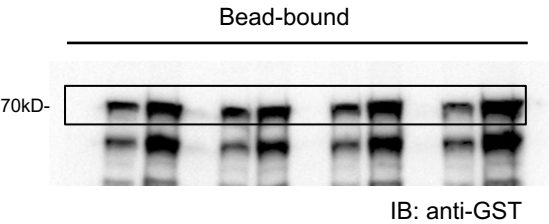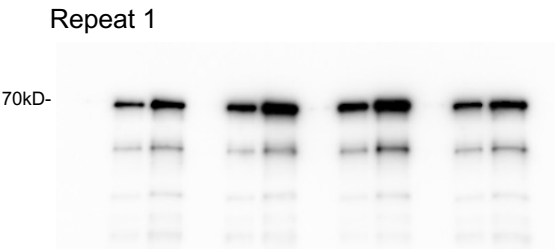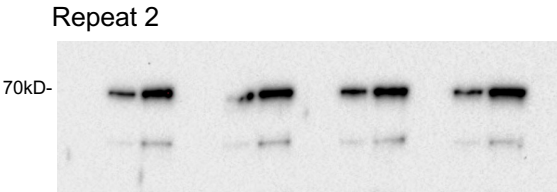

Figure 4E

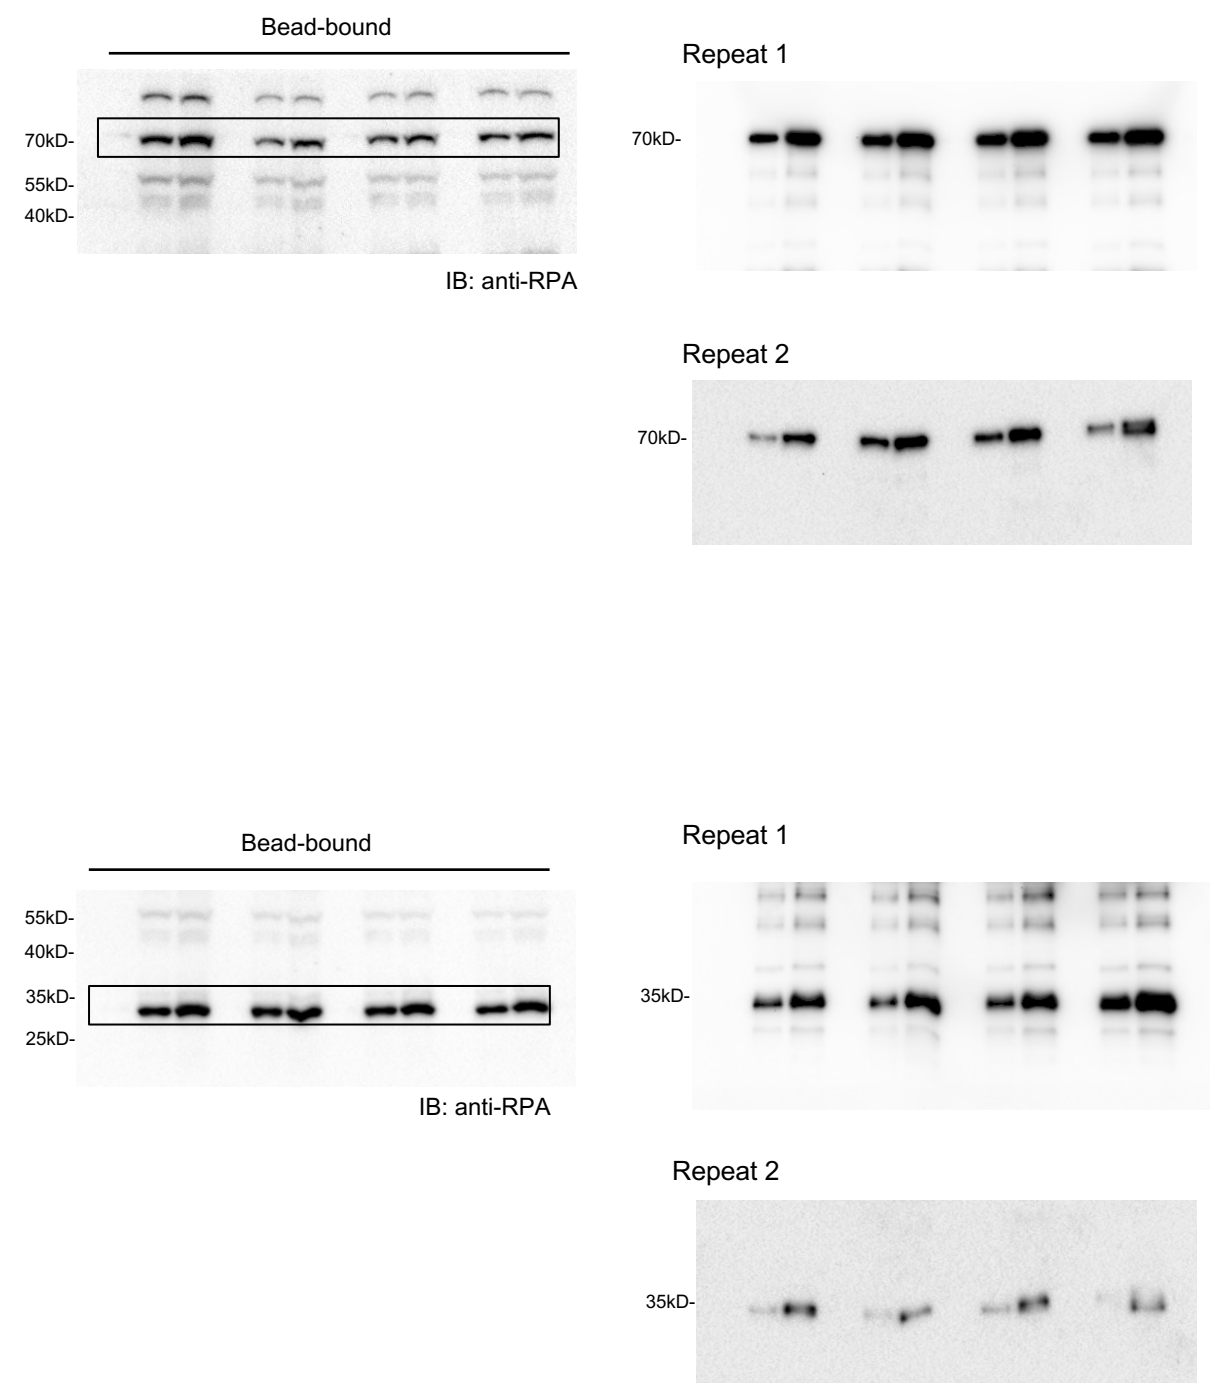

Figure 4E

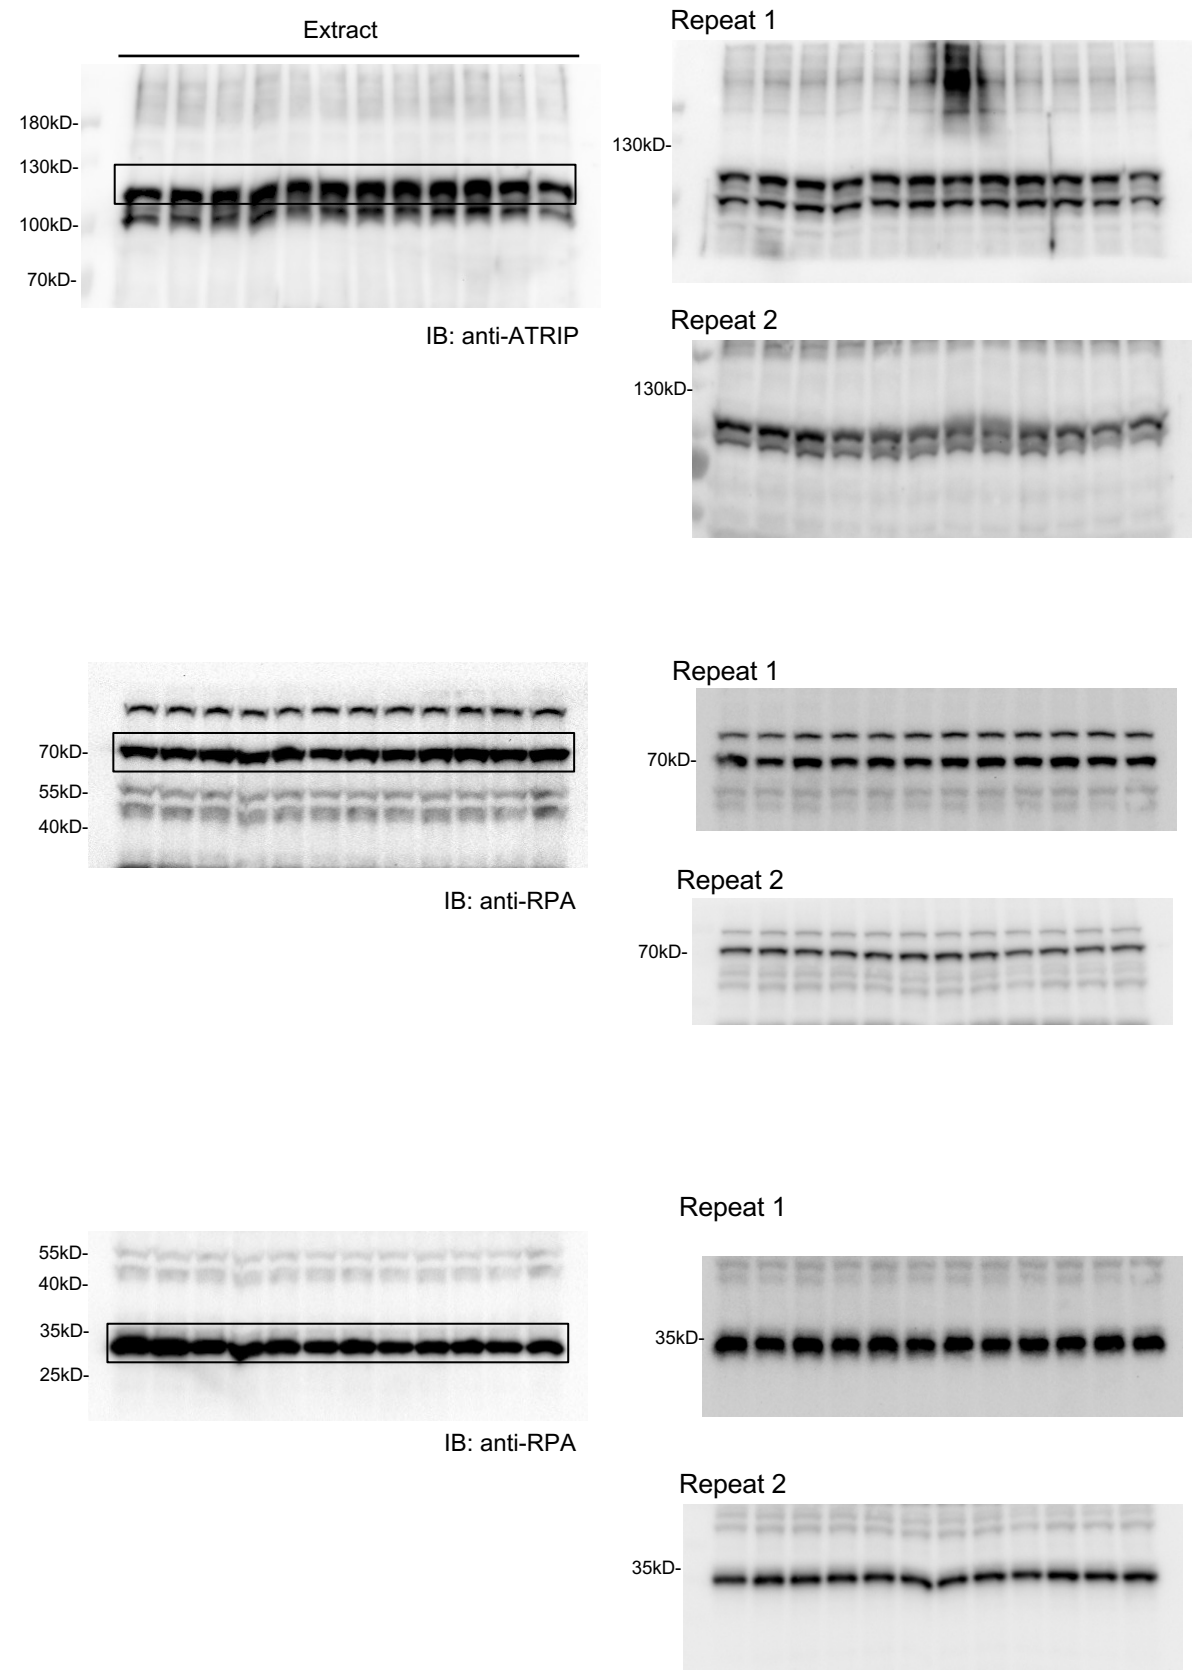

Figure 4E

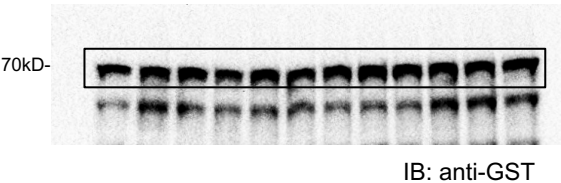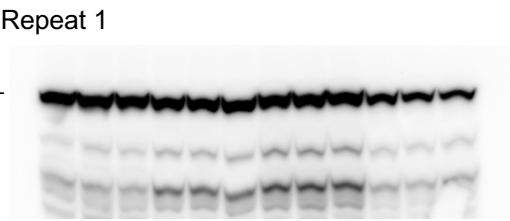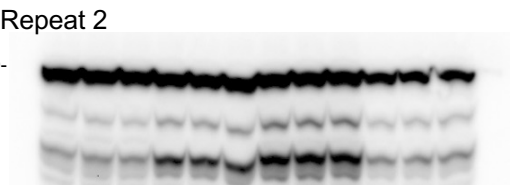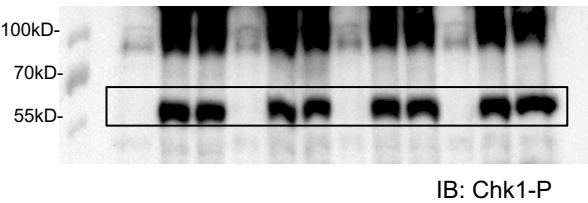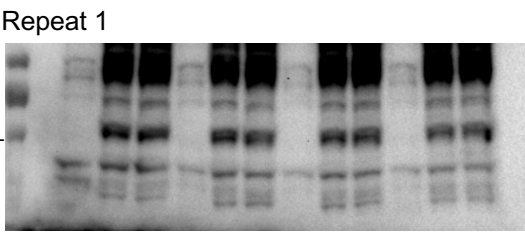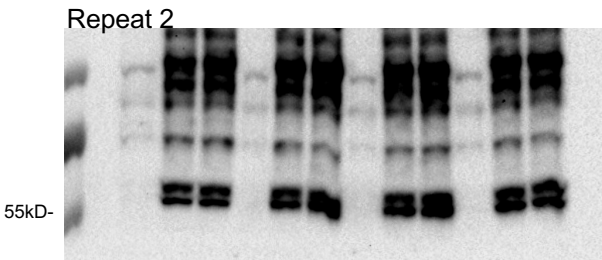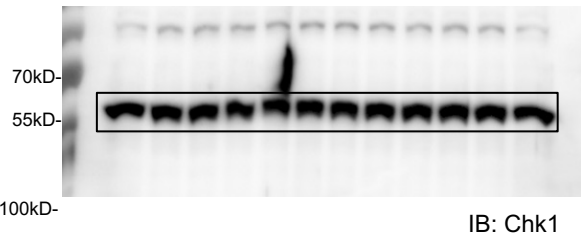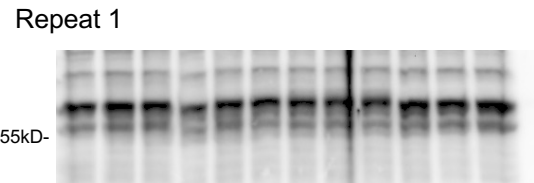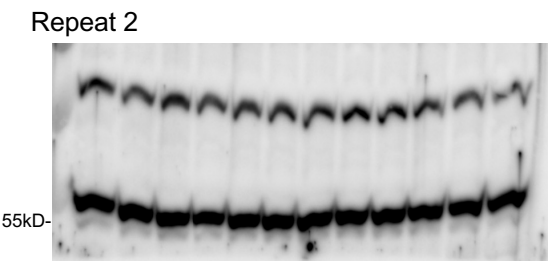

Supplement: fig4-data4 [file elife-82324-fig4-data4-v1.zip]

Figure 4-figure supplement 1B

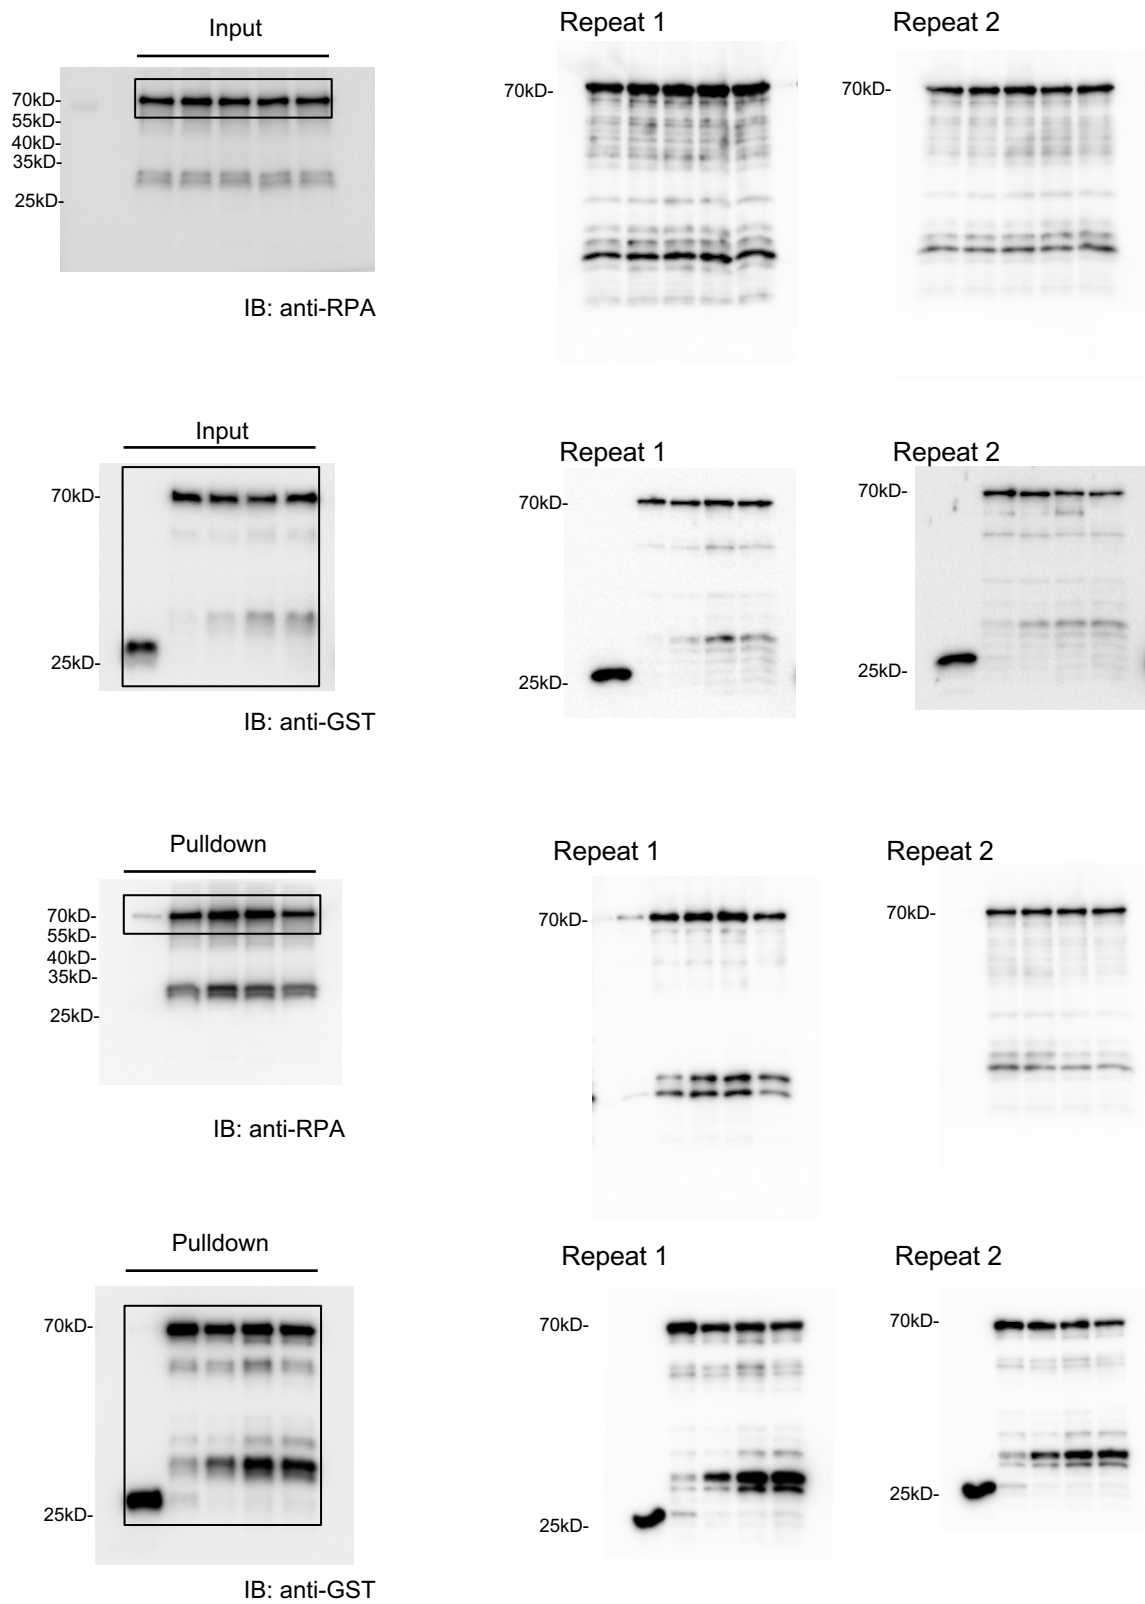

Supplement: fig4-figsupp1-data1 [file IB-data-Figure 4S1B.pdf › Figure 4-figure supplement 1-souce data 1/IB-data-Figure 4S1B.pdf]

Figure 4-figure supplement 3C

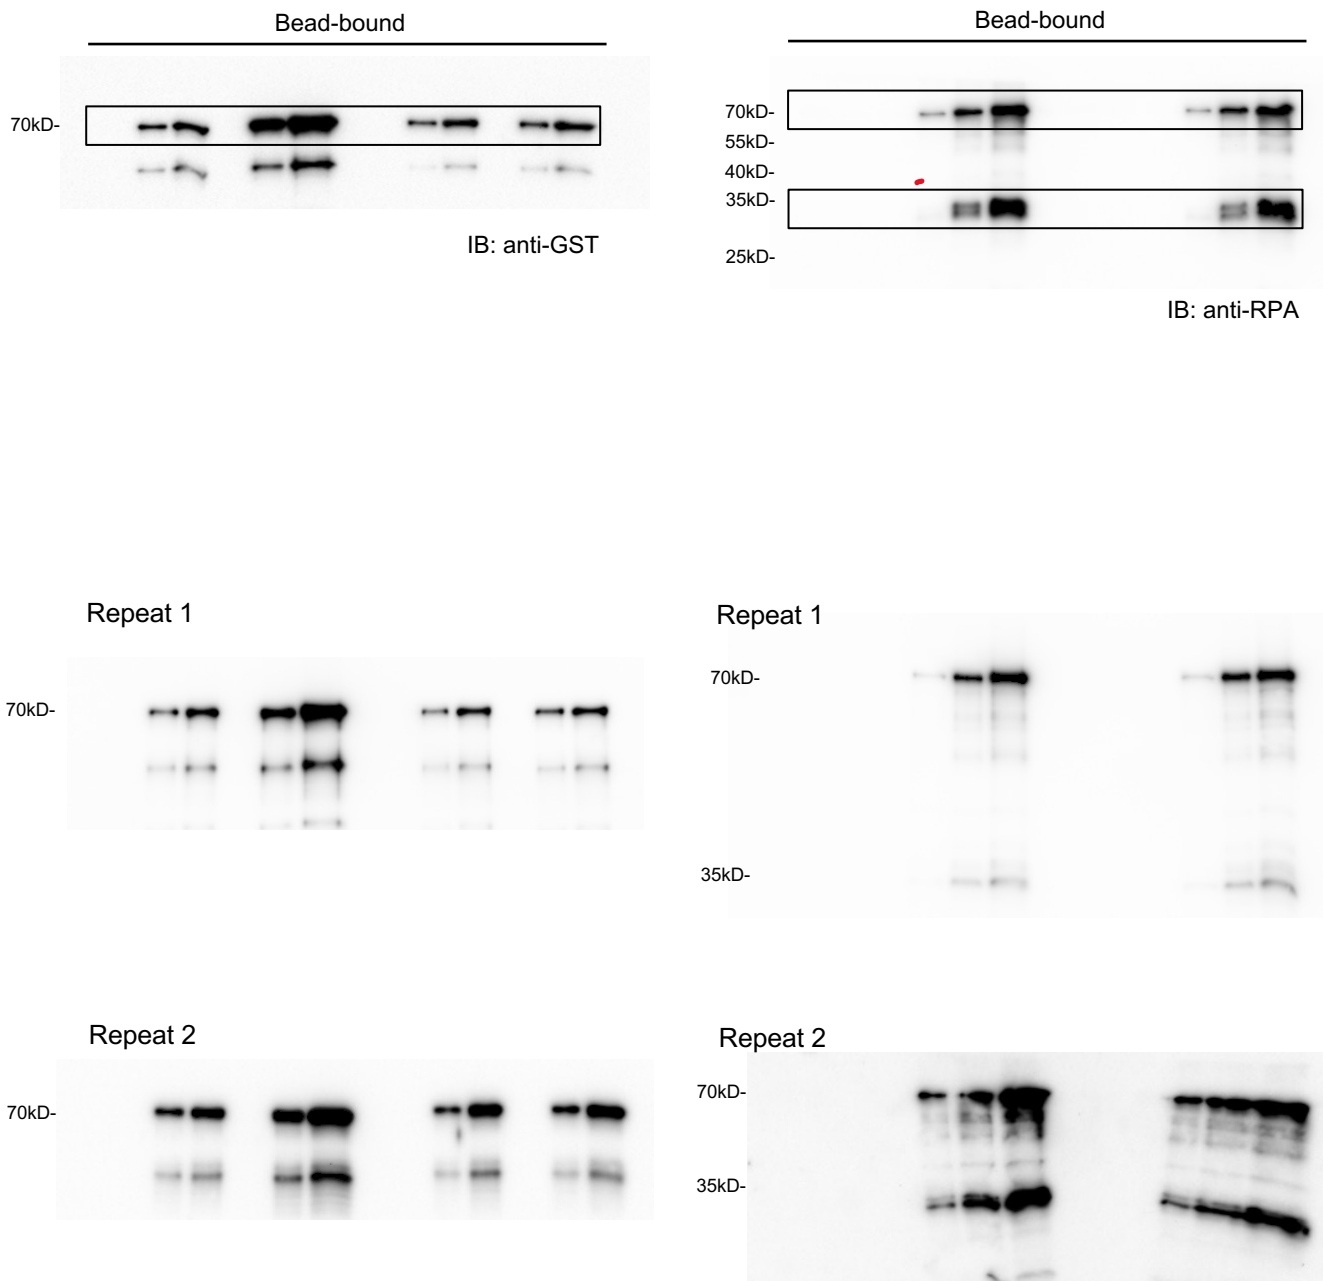

Figure 4-figure supplement 3C

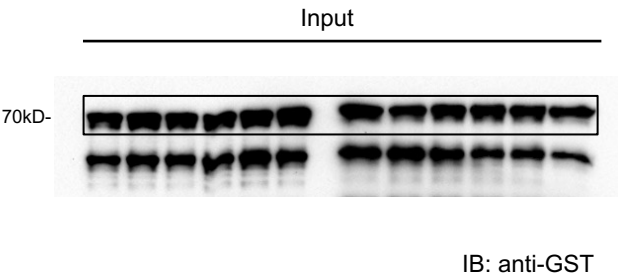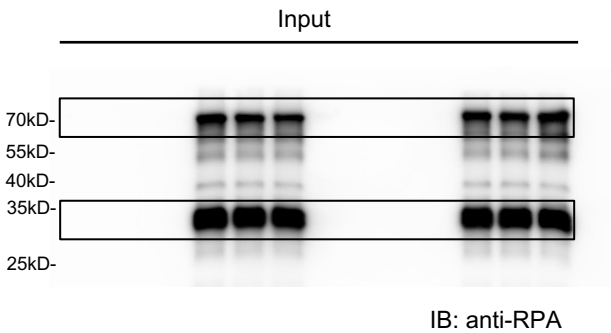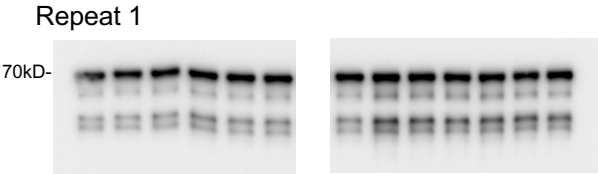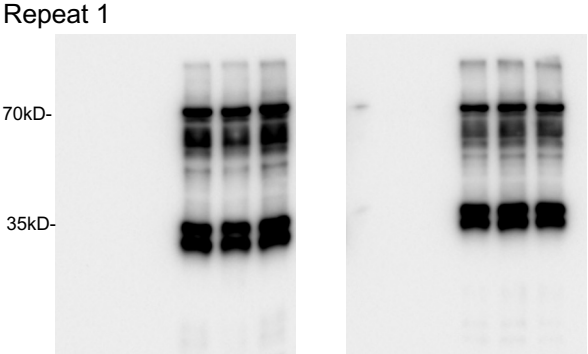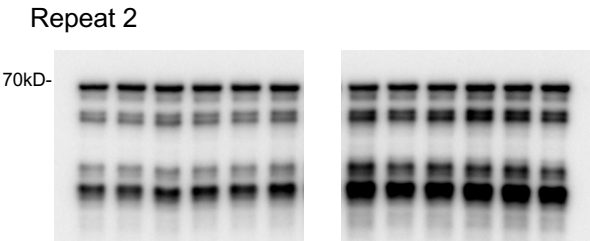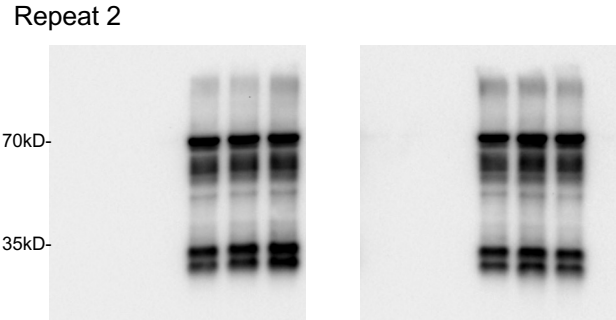

Supplement: fig4-figsupp3-data2 [file IB-data-Figure 4S3C.pdf › Figure 4-figure supplement 3-souce data 2/IB-data-Figure 4S3C.pdf]

Figure 4-figure supplement 3E

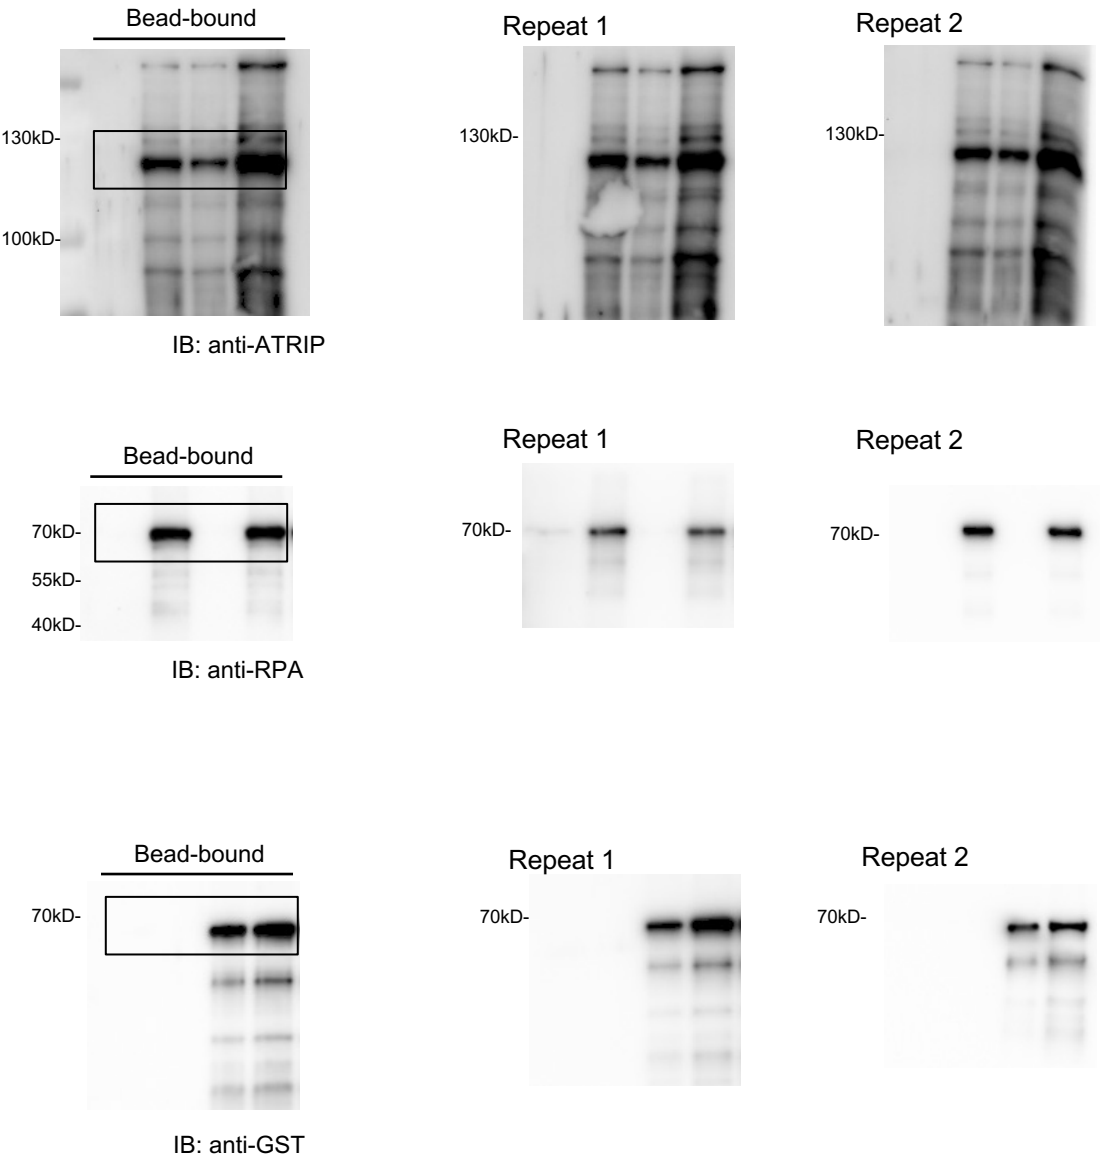

Figure 4-figure supplement 3E

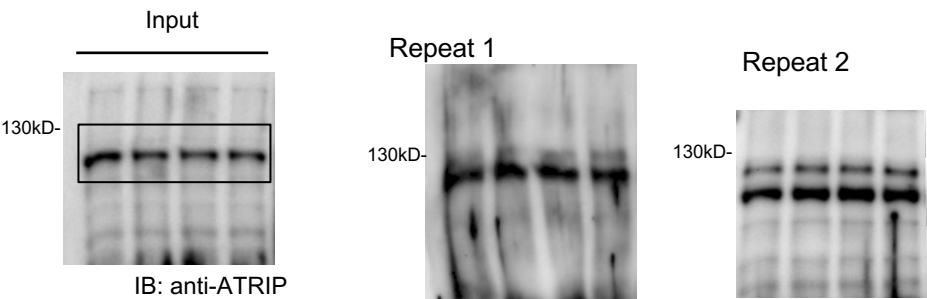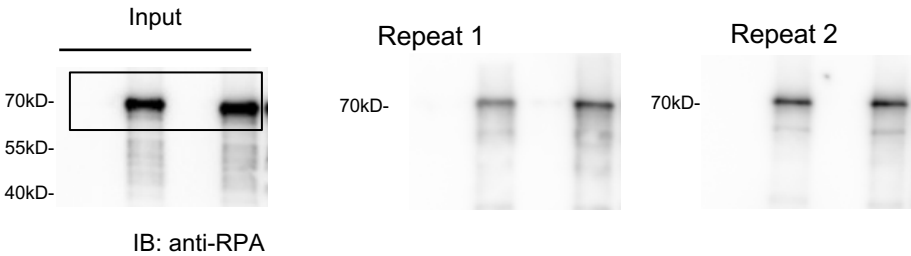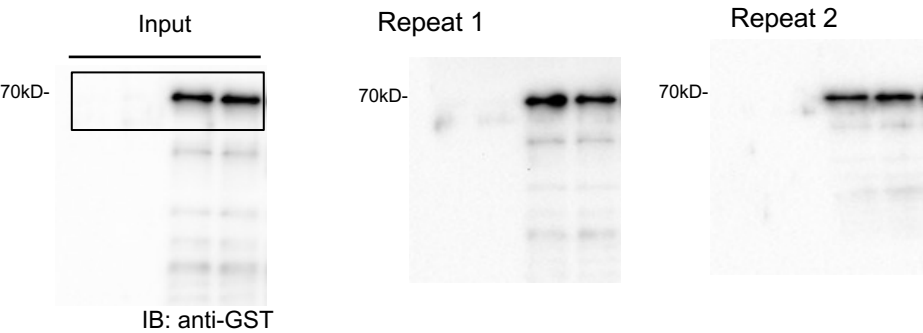

Supplement: fig4-figsupp3-data3 [file IB-data-Figure 4S3E.pdf › Figure 4-figure supplement 3-souce data 3/IB-data-Figure 4S3E.pdf]
